1 **Title:** Optical determination of absolute membrane potential

2 **Authors:** Julia R. Lazzari-Dean<sup>1</sup>, Anneliese M.M. Gest<sup>1</sup>, and Evan W. Miller<sup>1,2,3\*</sup>

3 **Affiliations:**

4 <sup>1</sup>Department of Chemistry, University of California, Berkeley, CA 94720, USA.

5 <sup>2</sup>Department of Molecular & Cell Biology, University of California, Berkeley, CA 94720, USA.

6 <sup>3</sup>Helen Wills Neuroscience Institute, University of California, Berkeley, CA 94720, USA.

7 \*Corresponding author: [evanwmiller@berkeley.edu](mailto:evanwmiller@berkeley.edu)

8 **Abstract**

9 All cells maintain ionic gradients across their plasma membranes, producing  
10 transmembrane potentials ( $V_{\text{mem}}$ ). Mounting evidence suggests a relationship between resting  
11  $V_{\text{mem}}$  and the physiology of non-excitable cells with implications in diverse areas, including  
12 cancer, cellular differentiation, and body patterning. A lack of non-invasive methods to record  
13 absolute  $V_{\text{mem}}$  limits our understanding of this fundamental signal. To address this need, we  
14 developed a fluorescence lifetime-based approach (VF-FLIM) to visualize and optically quantify  
15  $V_{\text{mem}}$  with single-cell resolution. Using VF-FLIM, we report  $V_{\text{mem}}$  distributions over thousands of  
16 cells, a 100-fold improvement relative to electrophysiological approaches. In human carcinoma  
17 cells, we visualize the voltage response to epidermal growth factor stimulation, stably recording a  
18 10-15 mV hyperpolarization over minutes. Using pharmacological inhibitors, we identify the  
19 source of the hyperpolarization as the  $\text{Ca}^{2+}$ -activated  $\text{K}^+$  channel  $\text{K}_{\text{Ca}3.1}$ . The ability to optically  
20 quantify absolute  $V_{\text{mem}}$  with cellular resolution will allow a re-examination of its roles as a cellular  
21 signal.

## 22 **Introduction**

23           Membrane potential ( $V_{\text{mem}}$ ) is an essential facet of cellular physiology. In electrically  
24 excitable cells, such as neurons and cardiomyocytes, voltage-gated ion channels enable rapid  
25 changes in membrane potential. These fast membrane potential changes, on the order of  
26 milliseconds to seconds, trigger release of neurotransmitters in neurons or contraction in myocytes.  
27 The resting membrane potential of these cells, which changes over longer timescales, affects their  
28 excitability. In non-electrically excitable cells, slower changes in  $V_{\text{mem}}$ —on the order of seconds  
29 to hours—are linked to a variety of fundamental cellular processes<sup>1</sup>, including mitosis<sup>2</sup>, cell cycle  
30 progression<sup>3</sup>, and differentiation<sup>4</sup>. At the tissue and organismal level, mounting lines of evidence  
31 point to the importance of electrochemical gradients in development, body patterning, and  
32 regeneration<sup>5</sup>.

33           Despite the importance of membrane potential to diverse processes over a range of time  
34 scales, the existing methods for recording  $V_{\text{mem}}$  are inadequate for characterizing distributions of  
35  $V_{\text{mem}}$  states in a sample or studying gradual shifts in resting membrane potential (**Figure 1-**  
36 **supplement 1**). Patch clamp electrophysiology remains the gold standard for recording cellular  
37 electrical parameters, but it is low throughput, highly invasive, and difficult to implement over  
38 extended time periods. Where reduced invasiveness or higher throughput analyses of  $V_{\text{mem}}$  are  
39 required, optical methods for detecting events involving  $V_{\text{mem}}$  changes (e.g. whether an action  
40 potential occurred) are often employed<sup>6-8</sup>. However, optical approaches generally use  
41 fluorescence intensity values as a readout, which cannot report either the absolute values of  $V_{\text{mem}}$   
42 or the absolute amount by which  $V_{\text{mem}}$  changed<sup>9</sup>. Variations in dye loading, illumination intensity,  
43 fluorophore bleaching, and/or cellular morphology dramatically complicate fluorescence intensity  
44 measurements, making calibration and determination of actual membrane potential difficult or

45 impossible. This limitation restricts optical analysis to detection of acute  $V_{\text{mem}}$  changes, which can  
46 be analyzed without comparisons of  $V_{\text{mem}}$  between cells or over long timescales. Two-component  
47 systems, with independent wavelengths for ratio-based calibration, have seen limited success<sup>10</sup>,  
48 and they confer significant capacitive load on the cell<sup>11</sup>. Further, their performance hinges on  
49 carefully tuned loading procedures of multiple lipophilic indicators<sup>12</sup>, which can be challenging  
50 to reproduce across different samples and days.

51 To quantify a parameter such as voltage or concentration from a single-color fluorescence  
52 signal, fluorescence lifetime ( $\tau_{\text{fl}}$ ) imaging (FLIM) can be employed instead of conventional  
53 fluorescence microscopy. By measuring the fluorescence lifetime, an intrinsic property of the  
54 sensor, FLIM avoids many of the artifacts that confound extrinsic fluorescence intensity  
55 measurements. As a result, FLIM can be calibrated to reproducibly and quantitatively report  
56 biological properties if the analyte or property in question affects the lifetime of the probe's  
57 fluorescent excited state. FLIM has been successfully employed to record a number of biochemical  
58 and biophysical parameters, including intracellular  $\text{Ca}^{2+}$  concentration<sup>13</sup>, viscosity<sup>14</sup>, GTPase  
59 activity<sup>15</sup>, kinase activity<sup>16</sup>, and redox state (NADH/NAD<sup>+</sup> ratio)<sup>17</sup>, among others<sup>18</sup>. Attempts to  
60 record absolute voltage with FLIM, however, have been limited in success<sup>19-21</sup>. Previous work  
61 focused on genetically-encoded voltage indicators (GEVIs), which have complex relationships  
62 between  $\tau_{\text{fl}}$  and voltage<sup>20</sup> and low sensitivity to voltage in lifetime<sup>21</sup>. Because of their poor voltage  
63 resolution, the fluorescence lifetimes of these GEVIs cannot be used to detect most biologically  
64 relevant voltage changes, which are on the order of tens of millivolts.

65 Fluorescent voltage indicators that use photoinduced electron transfer (PeT) as a voltage-  
66 sensing mechanism are promising candidates for a FLIM-based approach to optical  $V_{\text{mem}}$   
67 quantification. Because PeT affects the nonradiative decay rate of the fluorophore excited state, it

68 has been successfully translated from intensity to  $\tau_{fl}$  imaging with a number of small molecule  
69 probes for  $Ca^{2+}$ <sup>22</sup>. We previously established that VoltageFluor (VF)-type dyes transduce changes  
70 in cellular membrane potential to changes in fluorescence intensity and that the voltage response  
71 of VF dyes is consistent with a photoinduced electron transfer (PeT)-based response mechanism  
72<sup>23,24</sup>. Changes in the transmembrane potential alter the rate of PeT<sup>25,26</sup> from an electron-rich aniline  
73 donor to a fluorescent reporter, thereby modulating the fluorescence intensity of VF dyes<sup>23</sup> (**Fig.**  
74 **1A,B**). VoltageFluors also display low toxicity and rapid, linear responses to voltage.

75 Here, we develop fluorescence lifetime imaging of VoltageFluor dyes (VF-FLIM) as a  
76 quantitative, all-optical approach for recording absolute membrane potential with single cell  
77 resolution. Using patch-clamp electrophysiology as a standard, we demonstrate that the  
78 fluorescence lifetime of the VoltageFluor dye VF2.1.Cl reports absolute membrane potential with  
79 >20-fold improved accuracy over previous optical approaches. To highlight the 100-fold increase  
80 in throughput over manual patch-clamp electrophysiology, we record resting membrane potentials  
81 of thousands of cells. To our knowledge, this work represents the first broad view of the  
82 distribution of resting membrane potentials present *in situ*. To showcase the spatiotemporal and  
83 voltage resolution of VF-FLIM, we quantify the gradual, small voltage changes that arise from  
84 growth factor stimulation of human carcinoma cells. Through pharmacological perturbations, we  
85 conclude that the voltage changes following epidermal growth factor (EGF) stimulation arise from  
86 activation of the calcium-activated potassium channel  $K_{Ca3.1}$ . Our results show that fluorescence  
87 lifetime of VF dyes is a generalizable and effective approach for studying resting membrane  
88 potential in a range of biological contexts.

## 89 **Results**

### 90 *VoltageFluor Fluorescence Lifetime Varies Linearly with Membrane Potential*

91 To characterize how the photoinduced electron transfer process affects fluorescence  
92 lifetime, we compared the  $\tau_{fl}$  of the voltage-sensitive dye VF2.1.Cl with its voltage-insensitive  
93 counterpart VF2.0.Cl (**Fig. 1B**). We recorded the  $\tau_{fl}$  of bath-applied VF dyes in HEK293T cells  
94 using time-correlated single-photon counting (TCSPC) FLIM (**Fig. 1C-E**). VF2.1.Cl is localized  
95 to the plasma membrane and exhibits a biexponential  $\tau_{fl}$  decay with decay constants of  
96 approximately 0.9 and 2.6 ns (**Scheme S2**). For all subsequent analysis of VF2.1.Cl lifetime, we  
97 refer to the weighted average  $\tau_{fl}$ , which is approximately 1.6 ns in HEK293T cell membranes at  
98 rest. VF2.0.Cl (**Fig. 1B**), which lacks the aniline substitution and is therefore voltage-insensitive  
99 <sup>24</sup>, shows a  $\tau_{fl}$  of 3.5 ns in cell membranes, which is similar to the lifetime of an unsubstituted  
100 fluorescein <sup>27</sup> (**Fig. 1-supplement 2**). We also examined VoltageFluor lifetimes at a variety of dye  
101 loading concentrations to test for concentration-dependent changes in dye lifetime, which have  
102 been reported for fluorescein derivatives <sup>28</sup>. Shortened VF lifetimes were observed at high dye  
103 concentrations (**Fig. 1-supplement 3**); all subsequent VF-FLIM studies were conducted at dye  
104 concentrations low enough to avoid this concentration-dependent change in lifetime.  
105

106 **Fig. 1. VoltageFluor FLIM linearly reports absolute membrane potential.**

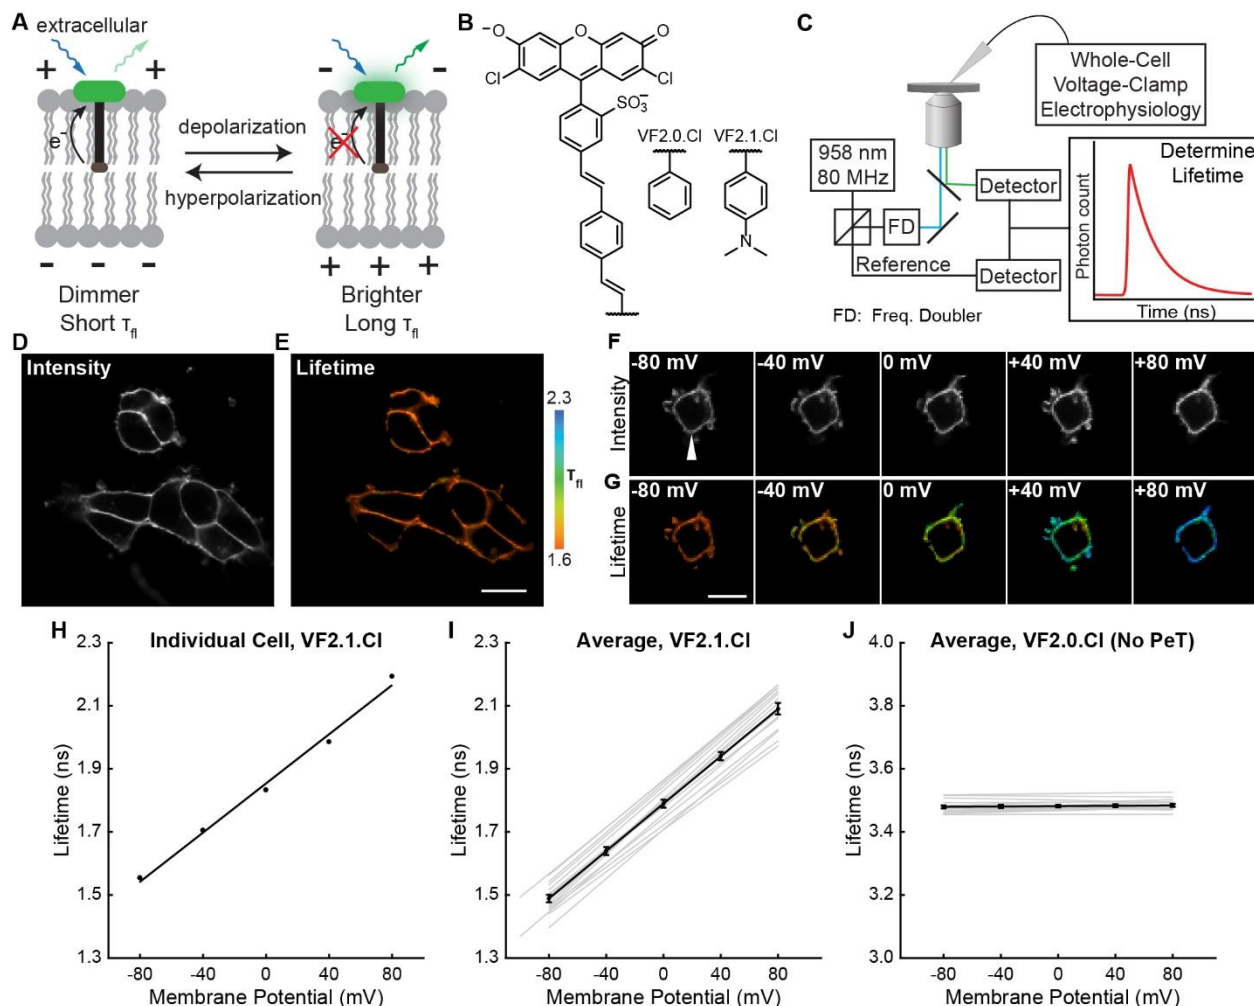

107  
 108  
 109 **Fig. 1. VoltageFluor FLIM linearly reports absolute membrane potential.** (A) Mechanism of  
 110 VoltageFluor dyes, in which depolarization of the membrane potential attenuates the rate of  
 111 photoinduced electron transfer. (B) Structures of the VF molecules used in this study. (C)  
 112 Schematic of the TCSPC system used to measure fluorescence lifetime. Simultaneous  
 113 electrophysiology was used to establish lifetime-voltage relationships. (D) Fluorescence intensity  
 114 and (E) lifetime of HEK293T cells loaded with 100 nM VF2.1.Cl. (F) Intensity and (G) lifetime  
 115 images of HEK293T cells voltage clamped at the indicated membrane potential. (H)  
 116 Quantification of the single trial shown in (G), with a linear fit to the data. (I) Evaluation of  
 117 VF2.1.Cl lifetime-voltage relationships in many individual HEK293T cells. Gray lines represent  
 118 linear fits on individual cells. Black line is the average lifetime-voltage relationship across all cells  
 119 (n=17). (J) VF2.0.Cl lifetime does not exhibit voltage-dependent changes. Gray lines represent  
 120 linear fits on individual cells, and the black line is the average lifetime-voltage relationship across  
 121 all cells (n=17). Scale bars represent 20  $\mu\text{m}$ . Error bars represent mean  $\pm$  SEM.

122

123

124 To assess the voltage dependence of VoltageFluor  $\tau_{fl}$ , we controlled the plasma membrane  
125 potential of HEK293T cells with whole-cell voltage-clamp electrophysiology while  
126 simultaneously measuring the  $\tau_{fl}$  of VF2.1.Cl (**Fig. 1C**). Single-cell recordings show a linear  $\tau_{fl}$   
127 response to applied voltage steps, and individual measurements deviate minimally from the linear  
128 fit (**Fig. 1F-H**). VF2.1.Cl  $\tau_{fl}$  is reproducible across different cells at the same resting membrane  
129 potential, allowing determination of  $V_{mem}$  from  $\tau_{fl}$  images taken without concurrent  
130 electrophysiology (**Fig. 1I**). Voltage-insensitive VF2.0.Cl shows no  $\tau_{fl}$  change in response to  
131 voltage (**Fig. 1J, Fig. 1-supplement 4**), consistent with a  $\tau_{fl}$  change in VF2.1.Cl arising from a  
132 voltage-dependent PeT process. In HEK293T cells, VF2.1.Cl exhibits a sensitivity of  $3.50 \pm 0.08$   
133 ps/mV and a 0 mV lifetime of  $1.77 \pm 0.02$  ns, corresponding to a fractional change in  $\tau_{fl}$  ( $\Delta\tau/\tau$ ) of  
134  $22.4 \pm 0.4\%$  per 100 mV. These values are in good agreement with the 27%  $\Delta F/F$  intensity change  
135 per 100 mV originally observed for VF2.1.Cl<sup>23,24</sup>. To estimate the voltage resolution of VF-FLIM,  
136 we analyzed the variability in successive measurements on the same cell (intra-cell resolution) and  
137 on different cells (inter-cell resolution, see **Methods**). We estimate that the resolution for tracking  
138 and quantifying voltage changes in a single HEK293T cell is 4 mV (intra-cell resolution), whereas  
139 the resolution for single-trial determination of a particular HEK293T cell's absolute  $V_{mem}$  is 20  
140 mV (inter-cell resolution).

141 We compared the performance of VF-FLIM to that of CAESR, the best previously  
142 reported GEVI for optically recording absolute membrane potential using FLIM<sup>21</sup>. Using  
143 simultaneous FLIM and voltage-clamp electrophysiology, we determined the relationship between  
144  $\tau_{fl}$  and  $V_{mem}$  for the genetically encoded voltage indicator CAESR under 1 photon excitation (**Fig.**  
145 **1-supplement 5**). We recorded a sensitivity of  $-1.2 \pm 0.1$  ps/mV and a 0 mV lifetime of  $2.0 \pm 0.2$   
146 ns, which corresponds to a  $-6.1 \pm 0.8\%$   $\Delta\tau/\tau$  per 100 mV (mean  $\pm$  SEM of 9 measurements), in

147 agreement with the reported sensitivity of -0.9 ps/mV and 0 mV lifetime of 2.7 ns with 2 photon  
148 excitation <sup>21</sup>. Relative to VF2.1.Cl, CAESR displays 3-fold lower sensitivity (-1.2 ps/mV vs 3.5  
149 ps/mV in HEK293T cells) and 7-fold higher voltage-independent variability in lifetime (0.46 ns  
150 vs 0.07 ns, standard deviation of the 0 mV lifetime measurement). For CAESR in HEK293T cells,  
151 we calculate a voltage resolution of  $37 \pm 7$  mV for quantifying voltage changes on an individual  
152 cell (intra-cell, compared to 4 mV for VF2.1.Cl, see **Methods**) and resolution of 390 mV for  
153 determination of a particular cell's absolute  $V_{\text{mem}}$  (inter-cell, compared to 20 mV for VF2.1.Cl).  
154 Because cellular resting membrane potentials and voltage changes (e.g. action potentials) are on  
155 the order of tens of millivolts, VF-FLIM has sufficient resolution for biologically relevant  $V_{\text{mem}}$   
156 recordings, whereas CAESR does not.

157

#### 158 *Evaluation of VF-FLIM across Cell Lines and Culture Conditions*

159 The voltage-dependent  $\tau_{\text{fl}}$  response of VF2.1.Cl is generalizable across different cell types.  
160 We calibrated VF-FLIM in four additional commonly used cell lines: A431, CHO, MDA-MB-  
161 231, and MCF-7 (**Fig. 2, Fig. 2-supplement 1, Fig. 2- supplement 2**). All cells displayed a linear  
162 relationship between VF  $\tau_{\text{fl}}$  and  $V_{\text{mem}}$ , with average sensitivities of 3.1 to 3.7 ps/mV and average  
163 0 mV lifetimes ranging from 1.74 to 1.87 ns. In all cases, we observed better voltage resolution  
164 for quantification of  $V_{\text{mem}}$  changes on a given cell versus comparisons of absolute  $V_{\text{mem}}$  between  
165 cells. For all cell lines tested, the changes in voltage for a given cell could be quantified with  
166 resolutions at or better than 5 mV (intra-cell resolution, **Methods**). For absolute  $V_{\text{mem}}$   
167 determination of a single cell, we observed voltage resolutions ranging from 11 to 24 mV (inter-  
168 cell resolution, **Fig. 2-supplement 3**). The inter-cell resolution of VF-FLIM appears to be cell-



169 type dependent; MCF-7 cells displayed greater variability than other cell lines tested (**Fig. 2B, Fig.**  
170 **2-supplement 3**).

171 To verify that VF-FLIM was robust in groups of cells in addition to the isolated, single  
172 cells generally used for patch clamp electrophysiology, we determined lifetime-voltage  
173 relationships for small groups of A431 cells (**Fig. 2-supplement 4A-E**). We found that calibrations  
174 made in small groups of cells are nearly identical to those obtained on individual cells, indicating  
175 that VF-FLIM only needs to be calibrated once for a given type of cell. For pairs or groups of three  
176 cells we recorded a sensitivity of  $3.3 \pm 0.2$  ps/mV and a 0 mV lifetime of  $1.78 \pm 0.02$  ns (mean  $\pm$   
177 SEM of 5 pairs and 2 groups of 3; values are for the entire group, not just the cell in contact with  
178 the electrode), which is similar to the sensitivity of  $3.55 \pm 0.08$  ps/mV and 0 mV lifetime of  $1.74$   
179  $\pm 0.02$  ns we observe in single A431 cells. The slight reduction in sensitivity seen in cell groups is  
180 likely attributable to space clamp error, which prevents complete voltage clamp of the cell group  
181 <sup>29,30</sup>. Indeed, when we analyzed only the most responsive cell in the group (in contact with the  
182 electrode), we obtained a slope of  $3.7 \pm 0.1$  ps/mV and 0 mV lifetime of  $1.79 \pm 0.02$  ns, in good  
183 agreement with the single cell data. The space clamp error can be clearly visualized (**Figure 2 –**  
184 **supplement 4E**), where one cell in the group of 3 responded much less to the voltage command.

185 To test whether VF-FLIM is also extensible to cells maintained with different culture  
186 conditions, we recorded lifetime- $V_{\text{mem}}$  relationship in serum-starved A431 cells (**Figure 2 –**  
187 **supplement 4F-K**), obtaining an average sensitivity of  $3.6 \pm 0.1$  ps/mV and a 0 mV lifetime of  
188  $1.76 \pm 0.01$  ns (n=2 single cells, 2 pairs, 3 groups of 3 cells), in excellent agreement with the values  
189 obtained for non-serum starved cells. We also tested for concentration-dependent changes in VF  
190 lifetime in all five cell lines and in serum starvation conditions. Similar to VF2.1.Cl lifetime in  
191 HEK293T cells (**Fig. 1-supplement 3**), we observed shortening of VF2.1.Cl lifetimes between

192 200 and 500 nM dye in all cases (**Figure 2-supplement 5**). All subsequent experiments were  
193 carried out at VF2.1.Cl concentrations well below the regime where VF concentration-dependent  
194 lifetime changes were observed.

195

196 **Fig. 2. VF-FLIM is a general and portable method for optically determining membrane**  
197 **potential.**

198

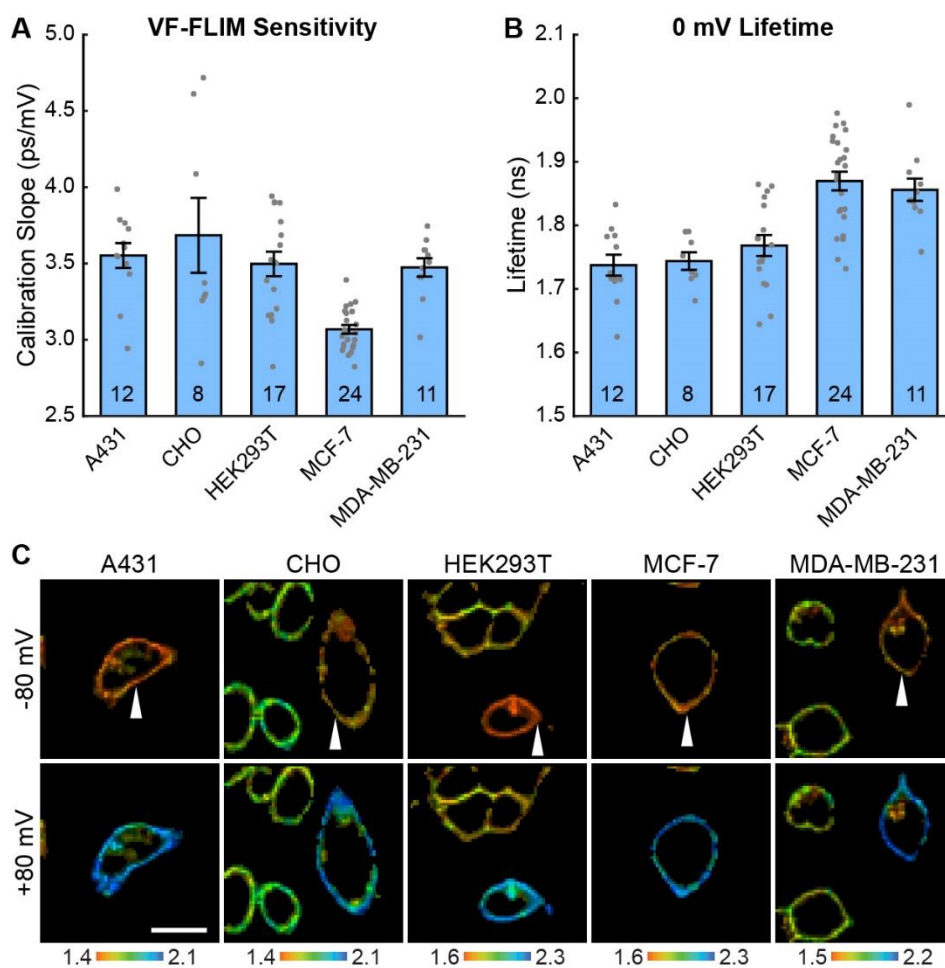

199

200

201 **Fig. 2. VF-FLIM is a general and portable method for optically determining membrane**  
202 **potential.** VF2.1.Cl lifetime-voltage relationships were determined with whole cell voltage clamp  
203 electrophysiology in five cell lines. (A) Slope and (B) 0 mV reference point of linear fits for the  
204 lifetime-voltage relationship, shown as mean  $\pm$  S.E.M. Gray dots are single cells. (C)  
205 Representative lifetime-intensity overlay images for each cell line with the indicated cells (white  
206 arrow) held at -80 mV (top) or +80 mV (bottom). Lifetime scales are in ns. Scale bar is 20  $\mu$ m.

207

## 208 *Optical Determination of Resting Membrane Potential Distributions*

209       The throughput of VF-FLIM enables cataloging of resting membrane potentials of  
210 thousands of cells in only a few hours of the experimenter's time. We optically recorded resting  
211 membrane potential distributions for A431, CHO, HEK293T, MCF-7, and MDA-MB-231 cells  
212 using VF-FLIM (**Fig. 3, Fig. 3 – supplement 1, Fig. 3 – supplement 2**). We report resting  
213 membrane potentials by cell group (**Methods, Scheme S2**) because adjacent cells in these cultures  
214 are electrically coupled to some degree via gap junctions<sup>31</sup>. Each group of cells represents an  
215 independent sample for  $V_{\text{mem}}$ . In addition, the fluorescent signal originating from membranes of  
216 adjacent cells cannot be separated with a conventional optical microscope, so assignment of a  
217 region of membrane connecting multiple cells would be arbitrary. VF-FLIM images (**Fig. 3, Fig.**  
218 **3 – supplement 1, Fig. 3 - supplement 2**) contain spatially resolved voltage information, but  
219 caution should be employed in interpreting pixel to pixel differences in lifetime. Because VF-  
220 FLIM was calibrated here using the average plasma membrane  $\tau_{\text{fl}}$  for each cell, optical  $V_{\text{mem}}$  should  
221 be interpreted per cell or cell group.

222       Mean resting membrane potentials recorded by VF-FLIM range from -53 to -29 mV,  
223 depending on the cell line. These average  $V_{\text{mem}}$  values fall within the range reported in the literature  
224 for all of the cell lines we measured (**Fig. 3 - supplement 3**). We also recorded resting membrane  
225 potentials in a high  $K^+$  buffer (120 mM  $K^+$ , “high  $K^+$  HBSS”), where we observed a depolarization  
226 of 15 to 41 mV, bringing the mean  $V_{\text{mem}}$  up to -26 mV to +4 mV, again depending on the cell line.  
227 Our optical determination of  $V_{\text{mem}}$  is in good agreement with theory: the Goldman-Hodgkin-Katz  
228 equation<sup>32</sup> predicts  $V_{\text{mem}}$  of -91 to -27 mV in 6 mM extracellular  $K^+$  and -25 to +2 mV in 120 mM  
229 extracellular  $K^+$ , depending on ion permeability and intracellular ion concentration (see **Methods**).

230 **Fig. 3. Rapid optical profiling of  $V_{\text{mem}}$  at rest and in high extracellular  $K^+$ .**

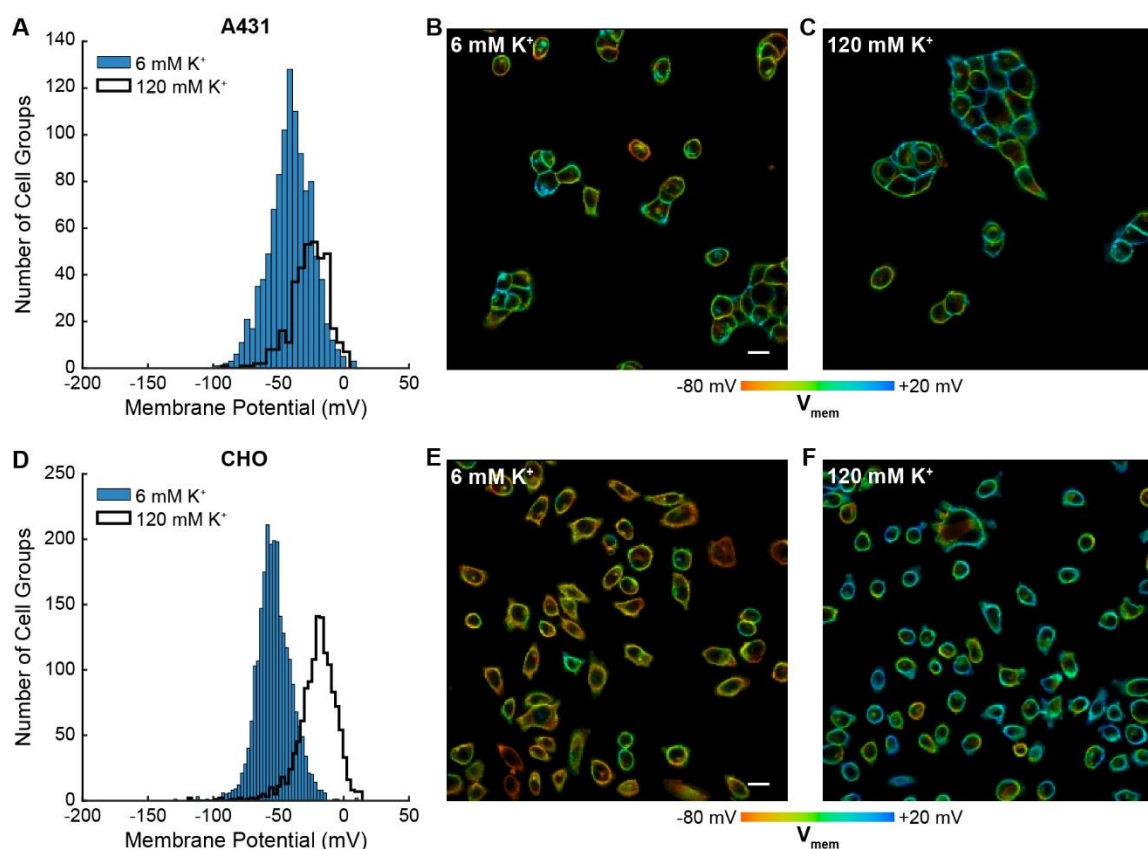

231  
232  
233 **Fig. 3.** Rapid optical profiling of  $V_{\text{mem}}$  at rest and in high extracellular  $K^+$ . Fluorescence lifetime  
234 images of cells incubated with 100 nM VF2.1.Cl were used to determine  $V_{\text{mem}}$  from previously  
235 performed electrophysiological calibration (**Fig. 2**). (**A**) Histograms of  $V_{\text{mem}}$  values recorded in  
236 A431 cells incubated with 6 mM extracellular  $K^+$  (commercial HBSS,  $n=1056$ ) or 120 mM  $K^+$   
237 (high  $K^+$  HBSS,  $n=368$ ). (**B**) Representative lifetime image of A431 cells in 6 mM extracellular  
238  $K^+$ . (**C**) Representative lifetime image of A431 cells in 120 mM extracellular  $K^+$ . (**D**) Histograms  
239 of  $V_{\text{mem}}$  values observed in CHO cells under normal ( $n=2410$ ) and high  $K^+$  ( $n=1310$ ) conditions.  
240 Representative lifetime image of CHO cells in (**E**) 6 mM and (**F**) 120 mM extracellular  $K^+$ . Bin  
241 sizes were determined by the Freedman-Diaconis rule. Intensities in the lifetime-intensity overlay  
242 images are not scaled to each other. Scale bars, 20  $\mu\text{m}$ .  
243

244 *Membrane potential dynamics in epidermal growth factor signaling*

245 We thought VF-FLIM was a promising method for elucidating the roles of membrane  
246 potential in non-excitable cell signaling. Specifically, we wondered whether VF-FLIM might be  
247 well-suited to dissect conflicting reports surrounding changes in membrane potential during  
248 EGF/EGF receptor (EGFR)-mediated signaling. Receptor tyrosine kinase (RTK)-mediated

249 signaling is a canonical signaling paradigm for eukaryotic cells, transducing extracellular signals  
250 into changes in cellular state. Although the involvement of second messengers like  $\text{Ca}^{2+}$ , cyclic  
251 nucleotides, and lipids are well characterized, membrane potential dynamics and their associated  
252 roles in non-excitable cell signaling remain less well-defined. In particular, the activation of EGFR  
253 via EGF has variously been reported to be depolarizing<sup>33</sup>, hyperpolarizing<sup>34</sup>, or electrically silent  
254<sup>35,36</sup>.

255 We find that treatment of A431 cells with EGF results in a 15 mV hyperpolarization within  
256 60-90 seconds in approximately 80% of cells (**Fig. 4A-C, Fig. 4-supplement 1, Fig. 4 –**  
257 **supplement 2**), followed by a slow return to baseline within 15 minutes (**Fig. 4D-F, Fig. 4–**  
258 **supplement 3**). The voltage response to EGF is dose-dependent, with an  $\text{EC}_{50}$  of 90 ng/mL (14  
259 nM) (**Fig. 4-supplement 4**). Vehicle-treated cells show very little  $\tau_{fl}$  change (**Fig. 4A-F**). Identical  
260 experiments with voltage-insensitive VF2.0.Cl (**Fig. 4G-H, Fig. 4 - supplement 1, Fig. 4 –**  
261 **supplement 3, Fig. 4 – supplement 5**) reveal little change in  $\tau_{fl}$  upon EGF treatment, indicating  
262 the drop in  $\tau_{fl}$  arises from membrane hyperpolarization. We observe the greatest hyperpolarization  
263 1 to 3 minutes after treatment with EGF, which is abolished by inhibition of EGFR and ErbB2  
264 tyrosine kinase activity with the covalent inhibitor canertinib (**Fig. 4I-J, Fig. 4-supplement 6**).  
265 Blockade of the EGFR kinase domain with gefitinib, a non-covalent inhibitor of EGFR, also results  
266 in a substantial decrease in the EGF-evoked hyperpolarization (**Fig. 4I-J, Fig. 4-supplement 6**).  
267 Together, these results indicate that A431 cells exhibit an EGF-induced hyperpolarization, which  
268 depends on the kinase activity of EGFR and persists on the timescale of minutes.

269

270

271

272 **Fig. 4. EGFR-mediated receptor tyrosine kinase activity produces a transient**  
 273 **hyperpolarization in A431 cells.**

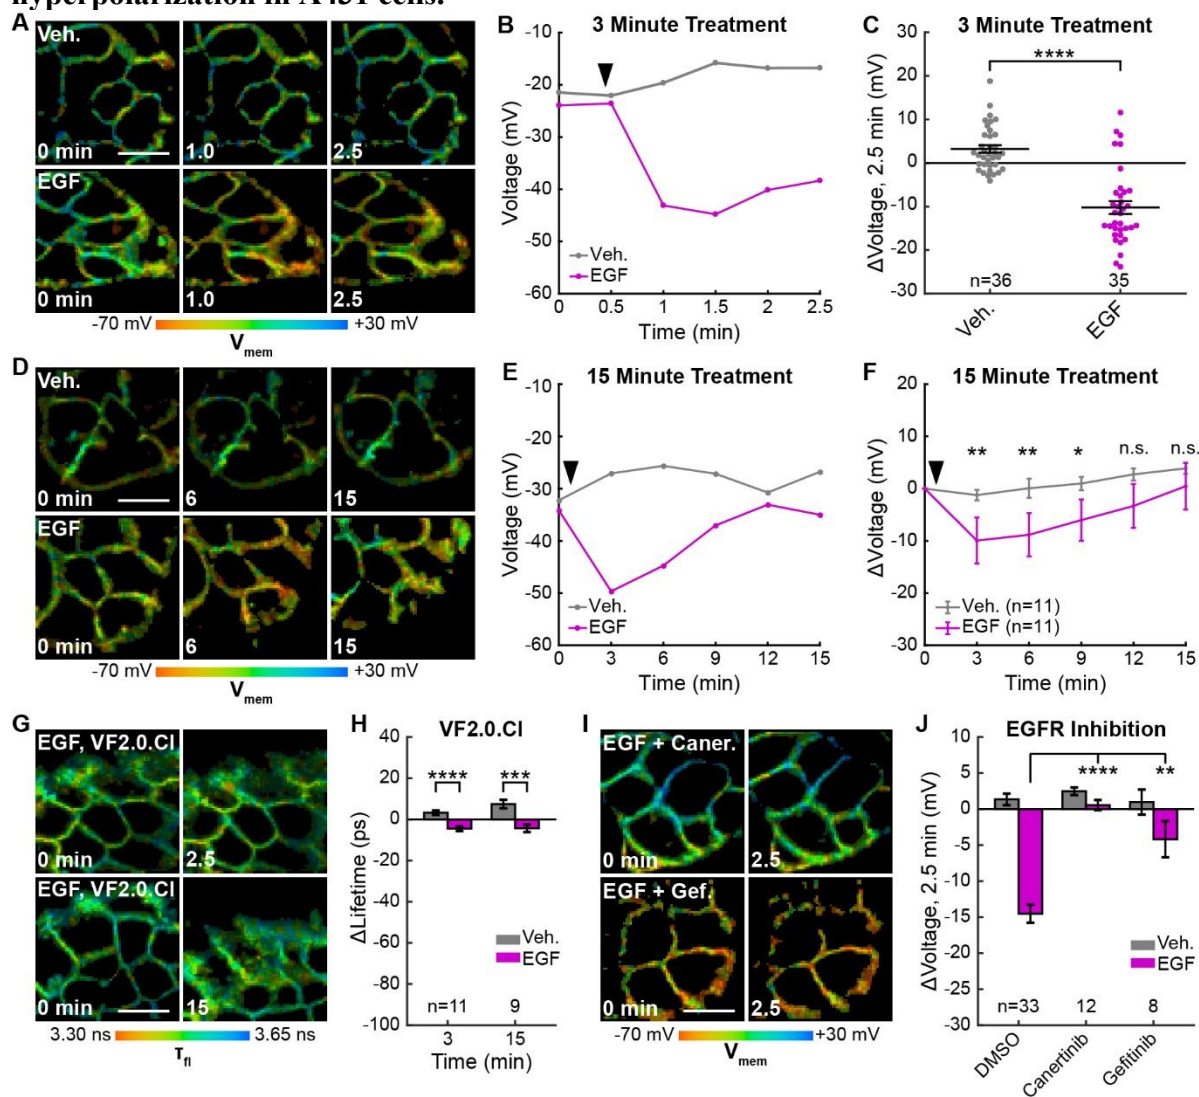

274 **Fig. 4. EGFR-mediated receptor tyrosine kinase activity produces a transient**  
 275 **hyperpolarization in A431 cells. (A)** Representative VF-FLIM time series of A431 cells treated with imaging buffer  
 276 vehicle (top) or 500 ng/mL EGF (80 nM, bottom). **(B)** Quantification of images in (A), with  
 277 Vehicle (Veh.)/EGF added at black arrow. **(C)** Aggregated responses for various trials of cells  
 278 treated with vehicle or EGF. **(D)** Lifetime images of longer-term effects of vehicle (top) or EGF  
 279 (bottom) treatment. **(E)** Quantification of images in (D). **(F)** Average response of cells over the  
 280 longer time course. **(G)** Images of VF2.0.Cl (voltage insensitive) lifetime before and after EGF  
 281 treatment. No  $\tau_{fl}$  change is observed 2.5 (top) or 15 minutes (bottom) following EGF treatment.  
 282 **(H)** Average VF2.0.Cl lifetime changes following EGF treatment. VF2.0.Cl graphs and images  
 283 are scaled across the same lifetime range (350 ps) as VF2.1.Cl plots and images. The small drift  
 284 observed would correspond to 2-4 mV of voltage change in VF2.1.Cl lifetime. **(I)** Lifetime images  
 285 of A431 cells before and after EGF addition, with 500 nM caneritinib (top) or 10  $\mu$ M gefitinib  
 286 (bottom). **(J)** Voltage changes 2.5 minutes after EGF addition in cells treated with DMSO (vehicle  
 287 control) or an EGFR inhibitor. Scale bars are 20  $\mu$ m. (C,F,H): Asterisks indicate significant  
 288 differences between vehicle and EGF at that time point. (J): Asterisks reflect significant  
 289 differences between vehicle and EGF at that time point.

290 differences between EGF-induced voltage responses with DMSO vehicle or an EGFR inhibitor  
291 (n.s.  $p > 0.05$ , \*  $p < 0.05$ , \*\*  $p < 0.01$ , \*\*\*  $p < 0.001$ , \*\*\*\*  $p < 0.0001$ , two-tailed, unpaired, unequal  
292 variances t-test).  
293

294 Outward  $K^+$  currents could mediate EGF-induced hyperpolarization. Consistent with this  
295 hypothesis, dissipation of the  $K^+$  driving force by raising extracellular  $[K^+]$  completely abolishes  
296 the typical hyperpolarizing response to EGF and instead results in a small depolarizing potential  
297 of approximately 3 mV (**Fig. 5A, Fig. 5 – supplement 1B**). Blockade of voltage-gated  $K^+$  channels  
298 ( $K_v$ ) with 4-aminopyridine (4-AP) prior to EGF treatment enhances the hyperpolarizing response  
299 to EGF (**Fig. 5A, 5B, Fig. 5–supplement 1C**). In contrast, blockade of  $Ca^{2+}$ -activated  $K^+$  channels  
300 ( $K_{Ca}$ ) with charybdotoxin (CTX) results in a depolarizing potential of approximately 4 mV after  
301 exposure to EGF, similar to that observed with high extracellular  $[K^+]$  (**Fig. 5A, 5B, Fig. 5-**  
302 **supplement 1D**). TRAM-34, a specific inhibitor of the intermediate-conductance  $Ca^{2+}$  activated  
303 potassium channel  $K_{Ca3.1}$ <sup>37</sup>, also abolishes EGF-induced hyperpolarization (**Fig. 5A, Fig. 5-**  
304 **supplement 1E**). CTX treatment has little effect on the resting membrane potential, while TRAM-  
305 34 or 4-AP depolarizes cells by approximately 5-10 mV (**Fig. 5-supplement 2**).

306 To explore the effects of other components of the EGFR pathway on EGF-induced  
307 hyperpolarization, we perturbed intra- and extracellular  $Ca^{2+}$  concentrations during EGF  
308 stimulation. Reduction of extracellular  $Ca^{2+}$  concentration did not substantially alter the EGF  
309 response (**Fig. 5A, Fig. 5-supplement 1F**). However, sequestration of intracellular  $Ca^{2+}$  with  
310 BAPTA-AM disrupts the hyperpolarization response. BAPTA-AM treated cells show a small, 4  
311 mV depolarization in response to EGF treatment, similar to CTX-treated cells (**Fig. 5A, Fig. 5-**  
312 **supplement 1G**). Perturbation of  $Ca^{2+}$  levels had little effect on the resting membrane potential  
313 (**Fig. 5-supplement 2**). Introduction of wortmannin (1  $\mu$ M) to block downstream kinase activity  
314 has no effect on the membrane potential response to EGF, while orthovanadate addition ( $Na_3VO_4$ ,

315 100  $\mu$ M) to block phosphatase activity results in a small increase in the hyperpolarizing response  
 316 (Fig. 5A, Fig. 5-supplement 1H-I). These results support a model for EGF-EGFR mediated  
 317 hyperpolarization in which RTK activity of EGFR causes release of internal  $\text{Ca}^{2+}$  stores to in turn  
 318 open  $\text{K}_{\text{Ca}}$  channels and hyperpolarize the cell (Fig. 5C).  
 319  
 320 **Fig. 5. EGF-induced hyperpolarization is mediated by a  $\text{Ca}^{2+}$  activated  $\text{K}^{+}$  channel.**

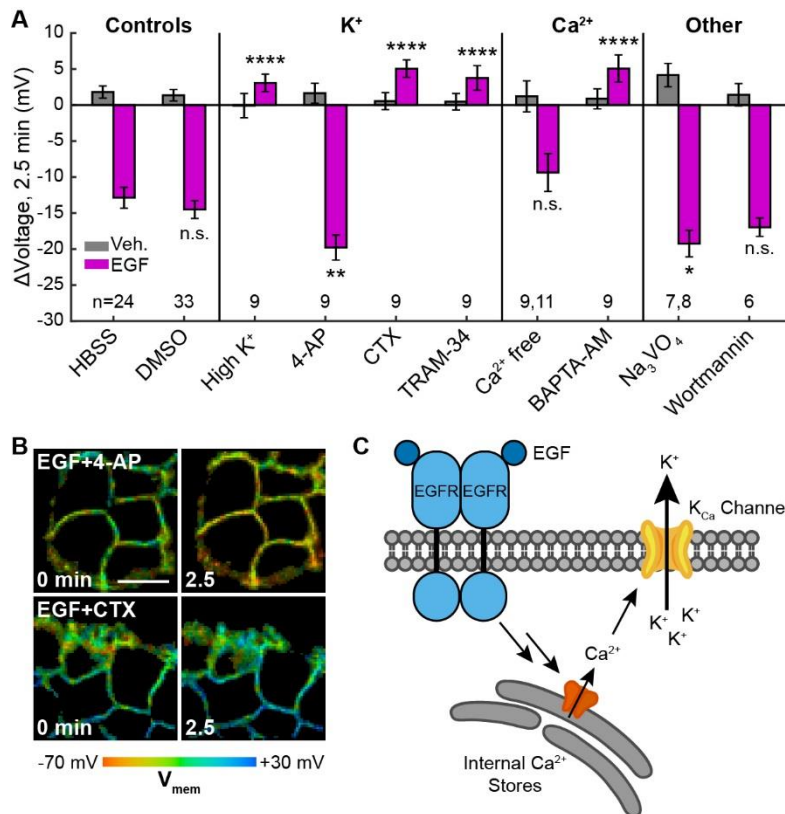

321  
 322 **Fig. 5. EGF-induced hyperpolarization is mediated by a  $\text{Ca}^{2+}$  activated  $\text{K}^{+}$  channel.** (A)  
 323 Comparison of the  $V_{\text{mem}}$  change 2.5 minutes after EGF addition in cells incubated in unmodified  
 324 imaging buffer (HBSS) or in modified solutions. (B) Lifetime images of A431 cells treated with  
 325 4-AP or CTX. (C) Model for membrane hyperpolarization following EGFR activation. Scale bar  
 326 is 20  $\mu$ m. Bars are mean  $\pm$  SEM. Sample sizes listed are (Veh, EGF); where only one number is  
 327 given, sample size was the same for both. Asterisks reflect significant differences in EGF-  
 328 stimulated  $V_{\text{mem}}$  change between the unmodified control (HBSS or DMSO) and modified solutions  
 329 (n.s.  $p > 0.05$ , \*  $p < 0.05$ , \*\*  $p < 0.01$ , \*\*\*  $p < 0.001$ , \*\*\*\*  $p < 0.0001$ , two-tailed, unpaired, unequal  
 330 variances t-test). DMSO: 0.1% DMSO, high  $\text{K}^{+}$ : 120 mM  $\text{K}^{+}$ , 4-AP: 5 mM 4-aminopyridine, CTX:  
 331 100 nM charybdotoxin, TRAM-34: 200 nM TRAM-34,  $\text{Ca}^{2+}$  free: 0 mM  $\text{Ca}^{2+}$  and  $\text{Mg}^{2+}$ , BAPTA-  
 332 AM: 10  $\mu$ M bisaminophenoxyethanetetraacetic acid acetoxymethyl ester,  $\text{Na}_3\text{VO}_4$ : 100  $\mu$ M  
 333 sodium orthovanadate, wortmannin: 1  $\mu$ M wortmannin.  
 334



## 335 **Discussion**

336 We report the design and implementation of a new method for optically quantifying  
337 absolute membrane potential in living cells. VF-FLIM is operationally simple, requires just a  
338 single-point calibration, and is applicable across a number of cell types. VF-FLIM exhibits a 20-  
339 fold improvement in voltage resolution over previous FLIM-based approaches<sup>20,21</sup>, achieving  
340 sufficient resolution to make biologically relevant voltage measurements. The photoinduced  
341 electron transfer mechanism of VoltageFluors<sup>23</sup> renders superior sensitivity and consistency of  
342 the lifetime measurement; furthermore, because VoltageFluors are applied exogenously, the vast  
343 majority of the fluorescence signal is voltage-sensitive and at the membrane. Unlike small-  
344 molecule FRET-oxonol approaches to optically estimate membrane potential values<sup>10</sup>, VF-FLIM  
345 presents a direct relationship between  $\tau_{fl}$  and  $V_{mem}$  with a single optical reporter and avoids  
346 complex and potentially toxic multi-dye loading protocols.

347 Because VF-FLIM is an optical approach, it improves upon both the throughput and spatial  
348 resolution of patch clamp electrophysiology and thereby enables new lines of inquiry in biological  
349 systems. Although individual VF-FLIM measurements have more voltage-equivalent noise than  
350 modern electrophysiology, the ability to perform thousands of recordings over the course of a few  
351 hours enables a more complete documentation of the distributions of cellular  $V_{mem}$  present in a cell  
352 population. In addition to throughput, another key difference between VF-FLIM and patch-clamp  
353 electrophysiology is spatial resolution. While VF-FLIM records the  $V_{mem}$  of an optically defined  
354 region of interest (in this case a cell or cell group), electrophysiology records  $V_{mem}$  at an individual  
355 cell or part of a cell where the electrode makes contact, which may or may not reflect the  $V_{mem}$  of  
356 the entire cell or group. In principle, VF-FLIM could record subcellular differences in  $V_{mem}$  that  
357 would be difficult to dissect with electrophysiology. Looking ahead, such subcellular recordings

358 in cells with complex morphology and processes are an exciting area for future development of  
359 VF-FLIM, in conjunction with cellular and sub-cellular strategies for targeting VF dyes<sup>38,39</sup>.

360 We optically documented resting membrane potential distributions in cultured cells, as VF-  
361 FLIM is well suited to address questions about  $V_{\text{mem}}$  states present in these samples. The presence  
362 and significance of distinct  $V_{\text{mem}}$  states in cell populations is mostly uncharacterized due to the  
363 throughput limitations of patch-clamp electrophysiology, but some reports suggest that distinct  
364  $V_{\text{mem}}$  states arise during the various phases of the cell cycle<sup>40,41</sup>.  $V_{\text{mem}}$  histograms presented in this  
365 work appear more or less unimodal, showing no clear sign of cell cycle-related  $V_{\text{mem}}$  states (**Fig.**  
366 **3A,D; Fig. 3-supplement 1A,D,G**). We considered the possibility that VF-FLIM does not detect  
367 cell-cycle-related  $V_{\text{mem}}$  states because we report average  $V_{\text{mem}}$  across cell groups in cases where  
368 cells are in contact (**Scheme S2**). This explanation is unlikely for two reasons. First,  $V_{\text{mem}}$   
369 distributions for CHO cells appear unimodal, even though CHO cultures were mostly comprised  
370 of isolated cells under the conditions tested (**Fig. 3D-F**). Second, theoretical work suggests that  
371 dramatically different  $V_{\text{mem}}$  states in adjacent cells are unlikely, as electrical coupling often leads  
372 to equilibration of  $V_{\text{mem}}$  across the cell group<sup>42,43</sup>. Although we cannot rule out the possibility of  
373 poorly separated  $V_{\text{mem}}$  populations (i.e. with a mean difference in voltage below our resolution  
374 limit), VF-FLIM both prompts and enables a re-examination of the notion that bi- or multimodal  
375  $V_{\text{mem}}$  distributions exist in cultured cells. Furthermore, VF-FLIM represents an exciting  
376 opportunity to experimentally visualize theorized  $V_{\text{mem}}$  patterns in culture and in more complex  
377 tissues. Studies towards this end are ongoing in our laboratory.

378 In the present study, we use VF-FLIM to provide the first cell-resolved, direct visualization  
379 of voltage changes induced by growth factor signaling. For long term  $V_{\text{mem}}$  recordings during  
380 growth-related processes, an optical approach is more attractive than an electrode-based one.

381 Electrophysiology becomes increasingly challenging as time scale lengthens, especially if cells  
382 migrate, and washout of the cytosol with pipette solution can change the very signals under study  
383 <sup>44,45</sup>. Previous attempts to electrophysiologically record  $V_{\text{mem}}$  in EGF-stimulated A431 cells were  
384 unsuccessful due to these technical challenges.<sup>34</sup> Because whole cell voltage-clamp  
385 electrophysiology was intractable, the  $V_{\text{mem}}$  response in EGF-stimulated A431 cells was addressed  
386 indirectly through model cell lines expressing EGFR exogenously <sup>34</sup>, bulk measurements on  
387 trypsinized cells in suspension <sup>46</sup>, or cell-attached single channel recordings <sup>47-49</sup>. By stably  
388 recording  $V_{\text{mem}}$  during EGF stimulation, VF-FLIM enables direct study of  $V_{\text{mem}}$  signaling in  
389 otherwise inaccessible pathways.

390 In conjunction with physiological manipulations and pharmacological perturbations, we  
391 explore the molecular mechanisms underlying EGF-induced hyperpolarization. We find that  
392 signaling along the EGF-EGFR axis results in a robust hyperpolarizing current carried by  $K^+$  ions,  
393 passed by the  $Ca^{2+}$ -activated  $K^+$  channel  $K_{Ca3.1}$ , and mediated by intracellular  $Ca^{2+}$  (**Fig. 5C**). We  
394 achieve a complete loss of the hyperpolarizing response to EGF by altering the  $K^+$  driving force  
395 (“High  $K^+$ ” **Fig. 5A**, **Fig. 5-supplement 1B**), blocking calcium-activated  $K^+$  currents directly  
396 (“CTX” and “TRAM-34”, **Fig. 5A**, **Fig. 5-supplement 1D,E**), or intercepting cytosolic  $Ca^{2+}$   
397 (“BAPTA-AM”, **Fig. 5A**, **Fig. 5-supplement 1G**). These results, combined with transcriptomic  
398 evidence that  $K_{Ca3.1}$  is the major  $K_{Ca}$  channel in A431 cells <sup>50</sup>, indicate that  $K_{Ca3.1}$  mediates the  
399 observed hyperpolarization. Interestingly, under some conditions where  $K^+$ -mediated  
400 hyperpolarization is blocked (“CTX,” “high  $K^+$ ,” “BAPTA-AM”), VF-FLIM reveals a small,  
401 secondary depolarizing current not visible during normal EGF stimulation. This current likely  
402 arises from initial  $Ca^{2+}$  entry into the cell, as previously observed during EGF signaling <sup>51,52</sup>.  
403 Although we have obtained direct and conclusive evidence of EGF-induced hyperpolarization in

404 A431 cells, the interactions between this voltage change and downstream targets of EGFR remain  
405 incompletely characterized. Enhancing EGF signaling by blockade of cellular tyrosine  
406 phosphatases with orthovanadate<sup>53</sup> correspondingly increases EGF-mediated hyperpolarization  
407 (“Na<sub>3</sub>VO<sub>4</sub>” **Fig. 5A, Fig. 5-supplement 1H**), but inhibition of downstream kinase activity appears  
408 to have little effect on hyperpolarization (“wortmannin” **Fig. 5A, Fig. 5-supplement 1I**).

409 In the context of RTK signaling,  $V_{\text{mem}}$  may serve to modulate the driving force for external  
410 Ca<sup>2+</sup> entry<sup>3,54</sup> and thereby act as a regulator of this canonical signaling ion. Alternatively,  $V_{\text{mem}}$   
411 may play a more subtle biophysical role, such as potentiating lipid reorganization in the plasma  
412 membrane<sup>55</sup>. Small changes in  $V_{\text{mem}}$  likely affect signaling pathways in ways that are currently  
413 completely unknown, but high throughput discovery of  $V_{\text{mem}}$  targets remains challenging.  
414 Combination of electrophysiology with single cell transcriptomics has begun to uncover  
415 relationships between  $V_{\text{mem}}$  and other cellular pathways in excitable cells<sup>56</sup>; such approaches could  
416 be coupled to higher throughput VF-FLIM methods to explore pathways that interact with  $V_{\text{mem}}$   
417 in non-excitabile contexts.

418 VF-FLIM represents a novel and general approach for interrogating the roles of membrane  
419 potential in fundamental cellular physiology. Future improvements to the voltage resolution could  
420 be made by use of more sensitive indicators, which may exhibit larger changes in fluorescence  
421 lifetime<sup>24</sup>. VF-FLIM can be further expanded to include the entire color palette of PeT-based  
422 voltage indicators<sup>57,58</sup>, allied with targeting methods to probe absolute membrane potential in  
423 heterogeneous cellular populations<sup>38,39</sup>, and coupled to high-speed imaging techniques for optical  
424 quantification of fast voltage events<sup>59</sup>.

## 425 **References**

- 426 (1) Abdul Kadir, L.; Stacey, M.; Barrett-Jolley, R. Emerging roles of the membrane potential:  
427 action beyond the action potential. *Front. Physiol.* **2018**, *9*, 1661.
- 428 (2) Cone, C. D.; Cone, C. M. Induction of mitosis in mature neurons in central nervous system  
429 by sustained depolarization. *Science* **1976**, *192*, 155–158.
- 430 (3) Huang, X.; Jan, L. Y. Targeting potassium channels in cancer. *J. Cell Biol.* **2014**, *206*, 151–  
431 162.
- 432 (4) Tsuchiya, W.; Okada, Y. Membrane potential changes associated with differentiation of  
433 enterocytes in the rat intestinal villi in culture. *Dev. Biol.* **1982**, *94*, 284–290.
- 434 (5) Levin, M. Molecular bioelectricity: how endogenous voltage potentials control cell  
435 behavior and instruct pattern regulation in vivo. *Mol. Biol. Cell* **2014**, *25*, 3835–3850.
- 436 (6) Huang, C. J.; Harootunian, A.; Maher, M. P.; Quan, C.; Raj, C. D.; McCormack, K.;  
437 Numann, R.; Negulescu, P. A.; González, J. E. Characterization of voltage-gated sodium-  
438 channel blockers by electrical stimulation and fluorescence detection of membrane  
439 potential. *Nat. Biotechnol.* **2006**, *24*, 439–446.
- 440 (7) McKeithan, W. L.; Savchenko, A.; Yu, M. S.; Cerignoli, F.; Bruyneel, A. A. N.; Price, J.  
441 H.; Colas, A. R.; Miller, E. W.; Cashman, J. R.; Mercola, M. An automated platform for  
442 assessment of congenital and drug-induced arrhythmia with hiPSC-derived  
443 cardiomyocytes. *Front. Physiol.* **2017**, *8*, 766.
- 444 (8) Zhang, H.; Reichert, E.; Cohen, A. E. Optical electrophysiology for probing function and  
445 pharmacology of voltage-gated ion channels. *Elife* **2016**, *5*.
- 446 (9) Peterka, D. S.; Takahashi, H.; Yuste, R. Imaging Voltage in Neurons. *Neuron* **2011**, *69*, 9–  
447 21.

- 448 (10) Gonzalez, J. E.; Tsien, R. Y. Improved indicators of cell membrane potential that use  
449 fluorescence resonance energy transfer. *Chem. Biol.* **1997**, *4*, 269–77.
- 450 (11) Briggman, K. L.; Kristan, W. B.; González, J. E.; Kleinfeld, D.; Tsien, R. Y. Monitoring  
451 integrated activity of individual neurons using FRET-based voltage-sensitive dyes. In  
452 *Membrane Potential Imaging in the Nervous System: Methods and Applications*; 2010; pp.  
453 61–70.
- 454 (12) Adams, D. S.; Levin, M. General principles for measuring resting membrane potential and  
455 ion concentration using fluorescent bioelectricity reporters. *Cold Spring Harb. Protoc.*  
456 **2012**, *7*, 385–397.
- 457 (13) Zheng, K.; Bard, L.; Reynolds, J. P.; King, C.; Jensen, T. P.; Gourine, A. V.; Rusakov, D.  
458 A. Time-Resolved Imaging Reveals Heterogeneous Landscapes of Nanomolar Ca<sup>2+</sup> in  
459 Neurons and Astroglia. *Neuron* **2015**, *88*, 277–288.
- 460 (14) Levitt, J. A.; Kuimova, M. K.; Yahioglu, G.; Chung, P.; Suhling, K.; Phillips, D. Membrane-  
461 bound molecular rotors measure viscosity in live cells via fluorescence lifetime imaging. *J.*  
462 *Phys. Chem. C* **2009**, *113*, 11634–11642.
- 463 (15) Harvey, C. D.; Yasuda, R.; Zhong, H.; Svoboda, K. The spread of Ras activity triggered by  
464 activation of a single dendritic spine. *Science (80-. )*. **2008**, *321*, 136–140.
- 465 (16) Lee, S.-J. R.; Escobedo-Lozoya, Y.; Szatmari, E. M.; Yasuda, R. Activation of CaMKII in  
466 single dendritic spines during long-term potentiation. *Nature* **2009**, *458*, 299–304.
- 467 (17) Blacker, T. S.; Duchen, M. R. Investigating mitochondrial redox state using NADH and  
468 NADPH autofluorescence. *Free Radic. Biol. Med.* **2016**, *100*, 53–65.
- 469 (18) Yellen, G.; Mongeon, R. Quantitative two-photon imaging of fluorescent biosensors. *Curr.*  
470 *Opin. Chem. Biol.* **2015**, *27*, 24–30.

- 471 (19) Dumas, D.; Stoltz, J. F. New tool to monitor membrane potential by FRET voltage sensitive  
472 dye (FRET-VSD) using spectral and fluorescence lifetime imaging microscopy (FLIM).  
473 Interest in cell engineering. *Clin. Hemorheol. Microcirc.* **2005**, *33*, 293–302.
- 474 (20) Hou, J. H.; Venkatachalam, V.; Cohen, A. E. Temporal dynamics of microbial rhodopsin  
475 fluorescence reports absolute membrane voltage. *Biophys. J.* **2014**, *106*, 639–648.
- 476 (21) Brinks, D.; Klein, A. J.; Cohen, A. E. Two-photon lifetime imaging of voltage indicating  
477 proteins as a probe of absolute membrane voltage. *Biophys. J.* **2015**, *109*, 914–921.
- 478 (22) Lakowicz, J. R.; Szmajcinski, H.; Johnson, M. L. Calcium imaging using fluorescence  
479 lifetimes and long-wavelength probes. *J. Fluoresc.* **1992**, *2*, 47–62.
- 480 (23) Miller, E. W.; Lin, J. Y.; Frady, E. P.; Steinbach, P. A.; Kristan, W. B.; Tsien, R. Y.  
481 Optically monitoring voltage in neurons by photo-induced electron transfer through  
482 molecular wires. *Proc. Natl. Acad. Sci. U. S. A.* **2012**, *109*, 2114–2119.
- 483 (24) Woodford, C. R.; Frady, E. P.; Smith, R. S.; Morey, B.; Canzi, G.; Palida, S. F.; Araneda,  
484 R. C.; Kristan, W. B.; Kubiak, C. P.; Miller, E. W.; et al. Improved PeT molecules for  
485 optically sensing voltage in neurons. *J. Am. Chem. Soc.* **2015**, *137*, 1817–1824.
- 486 (25) Li, L. S. Fluorescence probes for membrane potentials based on mesoscopic electron  
487 transfer. *Nano Lett.* **2007**, *7*, 2981–2986.
- 488 (26) de Silva, A. P.; Gunaratne, H. Q. N.; Habib-Jiwan, J.-L.; McCoy, C. P.; Rice, T. E.;  
489 Soumillion, J.-P. New fluorescent model compounds for the study of photoinduced electron  
490 transfer: the influence of a molecular electric field in the excited state. *Angew. Chem. Int.*  
491 *Ed. Engl.* **1995**, *34*, 1728–1731.
- 492 (27) Magde, D.; Rojas, G. E.; Seybold, P. G. Solvent dependence of the fluorescence lifetimes  
493 of xanthene dyes. *Photochem. Photobiol.* **1999**, *70*, 737–744.

- 494 (28) Chen, R. F.; Knutson, J. R. Mechanism of fluorescence concentration quenching of  
495 carboxyfluorescein in liposomes: Energy transfer to nonfluorescent dimers. *Anal. Biochem.*  
496 **1988**, *172*, 61–77.
- 497 (29) Williams, S. R.; Mitchell, S. J. Direct measurement of somatic voltage clamp errors in  
498 central neurons. *Nat. Neurosci.* **2008**, *11*, 790–798.
- 499 (30) Armstrong, C. M.; Gilly, W. F. Access resistance and space clamp problems associated with  
500 whole-cell patch clamping. *Methods Enzymol.* **1992**, *207*, 100–122.
- 501 (31) Meşe, G.; Richard, G.; White, T. W. Gap junctions: Basic structure and function. *J. Invest.*  
502 *Dermatol.* **2007**, *127*, 2516–2524.
- 503 (32) Hodgkin, A. L.; Katz, B. The effect of sodium ions on the electrical activity of the giant  
504 axon of the squid. *J. Physiol.* **1949**, *108*, 37–77.
- 505 (33) Rothenberg, P.; Reuss, L.; Glaser, L. Serum and epidermal growth factor transiently  
506 depolarize quiescent BSC-1 epithelial cells. *Proc. Natl. Acad. Sci. U. S. A.* **1982**, *79*, 7783–  
507 7787.
- 508 (34) Pandiella, A.; Magni, M.; Lovisolò, D.; Meldolesi, J. The effects of epidermal growth factor  
509 on membrane potential. *J. Biol. Chem.* **1989**, *264*, 12914–12921.
- 510 (35) Moolenaar, W. H.; Yarden, Y.; de Laat, S. W.; Schlessinger, J. Epidermal growth factor  
511 induces electrically silent Na<sup>+</sup> influx in human fibroblasts. *J. Biol. Chem.* **1982**, *257*, 8502–  
512 8506.
- 513 (36) Moolenaar, W. H.; Aerts, R. J.; Tertoolen, L. G. J.; De Laat, S. W. The epidermal growth  
514 factor-induced calcium signal in A431 cells. *J. Biol. Chem.* **1986**, *261*, 279–284.
- 515 (37) Wulff, H.; Miller, M. J.; Hänsel, W.; Grissmer, S.; Cahalan, M. D.; Chandy, K. G. Design  
516 of a potent and selective inhibitor of the intermediate-conductance Ca<sup>2+</sup>-activated K<sup>+</sup>



- 517 channel, IKCa1: A potential immunosuppressant. *Proc. Natl. Acad. Sci.* **2000**, *97*, 8151–  
518 8156.
- 519 (38) Liu, P.; Grenier, V.; Hong, W.; Muller, V. R.; Miller, E. W. Fluorogenic targeting of  
520 voltage-sensitive dyes to neurons. *J. Am. Chem. Soc.* **2017**, *139*, 17334–17340.
- 521 (39) Grenier, V.; Daws, B. R.; Liu, P.; Miller, E. W. Spying on Neuronal Membrane Potential  
522 with Genetically Targetable Voltage Indicators. *J. Am. Chem. Soc.* **2019**.
- 523 (40) Ouadid-Ahidouch, H.; Le Bourhis, X.; Roudbaraki, M.; Toillon, R. A.; Delcourt, P.;  
524 Prevarskaya, N. Changes in the K<sup>+</sup> current-density of MCF-7 cells during progression  
525 through the cell cycle: Possible involvement of a h-ether.a-gogo K<sup>+</sup> channel. *Receptors*  
526 *Channels* **2001**, *7*, 345–356.
- 527 (41) Wonderlin, W. F.; Woodfork, K. A.; Strobl, J. S. Changes in membrane potential during the  
528 progression of MCF-7 human mammary tumor cells through the cell cycle. *J. Cell. Physiol.*  
529 **1995**, *165*, 177–185.
- 530 (42) Cervera, J.; Alcaraz, A.; Mafe, S. Bioelectrical signals and ion channels in the modeling of  
531 multicellular patterns and cancer biophysics. *Sci. Rep.* **2016**, *6*, 1–14.
- 532 (43) Cervera, J.; Meseguer, S.; Mafe, S. The interplay between genetic and bioelectrical  
533 signaling permits a spatial regionalisation of membrane potentials in model multicellular  
534 ensembles. *Sci. Rep.* **2016**, *6*, 35201.
- 535 (44) Horn, R.; Korn, S. J. Prevention of rundown in electrophysiological recording. *Methods*  
536 *Enzymol.* **1992**, *207*, 149–155.
- 537 (45) Malinow, R.; Tsien, R. W. Presynaptic enhancement shown by whole-cell recordings of  
538 long-term potentiation in hippocampal slices. *Nature* **1990**, *346*, 177–180.
- 539 (46) Magni, M.; Meldolesi, J.; Pandiella, A. Ionic events induced by epidermal growth factor:

- 540 Evidence that hyperpolarization and stimulated cation influx play a role in the stimulation  
541 of cell growth. *J. Biol. Chem.* **1991**, *266*, 6329–6335.
- 542 (47) Peppelenbosch, M. P.; Tertoolen, L. G. J.; De Laat, S. W. Epidermal growth factor-activated  
543 calcium and potassium channels. *J. Biol. Chem.* **1991**, *266*, 19938–19944.
- 544 (48) Lückhoff, A.; Clapham, D. E. Calcium channels activated by depletion of internal calcium  
545 stores in A431 cells. *Biophys. J.* **1994**, *67*, 177–182.
- 546 (49) Mozhayeva, G. N.; Naumov, A. P.; Kuryshev, Y. A. Epidermal growth factor activates  
547 calcium-permeable channels in A 431 cells. *Biochim. Biophys. Acta - Mol. Cell Res.* **1989**,  
548 *1011*, 171–175.
- 549 (50) Thul, P. J.; Åkesson, L.; Wiking, M.; Mahdessian, D.; Geladaki, A.; Ait Blal, H.; Alm, T.;  
550 Asplund, A.; Björk, L.; Breckels, L. M.; et al. A subcellular map of the human proteome.  
551 *Science (80-. )*. **2017**, *356*, eaal3321.
- 552 (51) Pandiella, A.; Malgaroli, A.; Meldolesi, J.; Vicentini, L. M. EGF raises cytosolic Ca<sup>2+</sup> in  
553 A431 and Swiss 3T3 cells by a dual mechanism: Redistribution from intracellular stores  
554 and stimulated influx. *Exp. Cell Res.* **1987**, *170*, 175–185.
- 555 (52) Marquèze-Pouey, B.; Mailfert, S.; Rouger, V.; Goillaud, J. M.; Marguet, D. Physiological  
556 epidermal growth factor concentrations activate high affinity receptors to elicit calcium  
557 oscillations. *PLoS One* **2014**, *9*, e106803.
- 558 (53) Reddy, R. J.; Gajadhar, A. S.; Swenson, E. J.; Rothenberg, D. A.; Curran, T. G.; White, F.  
559 M. Early signaling dynamics of the epidermal growth factor receptor. *Proc. Natl. Acad. Sci.*  
560 *U. S. A.* **2016**, *113*, 3114–3119.
- 561 (54) Yang, M.; Brackenbury, W. J. Membrane potential and cancer progression. *Front. Physiol.*  
562 **2013**, *4*, 1–10.

- 563 (55) Zhou, Y.; Wong, C.; Cho, K.; van der Hoeven, D.; Liang, H.; Thakur, D. P.; Luo, J.; Babic,  
564 M.; Zinsmaier, K. E.; Zhu, M. X.; et al. Membrane potential modulates plasma membrane  
565 phospholipid dynamics and K-Ras signaling. *Science* (80-. ). **2015**, *349*, 873–876.
- 566 (56) Cadwell, C. R.; Palasantza, A.; Jiang, X.; Berens, P.; Deng, Q.; Yilmaz, M.; Reimer, J.;  
567 Shen, S.; Bethge, M.; Tolia, K. F.; et al. Electrophysiological, transcriptomic and  
568 morphologic profiling of single neurons using Patch-seq. *Nat. Biotechnol.* **2016**, *34*, 199–  
569 203.
- 570 (57) Huang, Y. L.; Walker, A. S.; Miller, E. W. A photostable silicon rhodamine platform for  
571 optical voltage sensing. *J. Am. Chem. Soc.* **2015**, *137*, 10767–10776.
- 572 (58) Deal, P. E.; Kulkarni, R. U.; Al-Abdullatif, S. H.; Miller, E. W. Isomerically pure  
573 tetramethylrhodamine voltage reporters. *J. Am. Chem. Soc.* **2016**, *138*, 9085–9088.
- 574 (59) Gao, L.; Liang, J.; Li, C.; Wang, L. V. Single-shot compressed ultrafast photography at one  
575 hundred billion frames per second. *Nature* **2014**, *516*, 74–77.
- 576 (60) Gordon, J. A. Use of vanadate as protein-phosphotyrosine phosphatase inhibitor. *Methods*  
577 *Enzymol.* **1991**, *201*, 477–482.
- 578 (61) Barry, P. H. JPCalc, a software package for calculating liquid junction potential corrections  
579 in patch-clamp, intracellular, epithelial and bilayer measurements and for correcting  
580 junction potential measurements. *J. Neurosci. Methods* **1994**, *51*, 107–116.
- 581 (62) Liu, M.; Jia, M.; Pan, H.; Li, L.; Chang, M.; Ren, H.; Argoul, F.; Zhang, S.; Xu, J.  
582 Instrument response standard in time-resolved fluorescence spectroscopy at visible  
583 wavelength: quenched fluorescein sodium. *Appl. Spectrosc.* **2014**, *68*, 577–583.
- 584 (63) Becker, W. *The bh TCSPC Handbook*; 5th edn.; Becker & Hickl, 2012.
- 585 (64) Boens, N.; Qin, W.; Basaric, N.; Hofkens, J.; Ameloot, M.; Pouget, J.; Lefevre, J.-P.;

- 586 Valeur, B.; Gratton, E.; VandeVen, M.; et al. Fluorescence lifetime standards for time and  
587 frequency domain fluorescence spectroscopy. *Anal. Chem.* **2007**, *79*, 2137–2149.
- 588 (65) Maher, M. P.; Wu, N. T.; Ao, H. pH-insensitive FRET voltage dyes. *J. Biomol. Screen.*  
589 **2007**, *12*, 656–667.
- 590 (66) Defarias, F. P.; Stevens, S. P.; Leonard, R. J. Stable expression of human Kv1.3 potassium  
591 channels resets the resting membrane potential of cultured mammalian cells. *Receptors*  
592 *Channels* **1995**, *3*, 273–281.
- 593 (67) Walker, B. D.; Valenzuela, S. M.; Singleton, C. B.; Tie, H.; Bursill, J. A.; Wyse, K. R.; Qiu,  
594 M. R.; Breit, S. N.; Campbell, T. J. Inhibition of HERG channels stably expressed in a  
595 mammalian cell line by the antianginal agent perhexiline maleate. *Br. J. Pharmacol.* **1999**,  
596 *127*, 243–251.
- 597 (68) Cone, C. D.; Tongier, M. Contact inhibition of division: Involvement of the electrical  
598 transmembrane potential. *J. Cell. Physiol.* **1973**, *82*, 373.
- 599 (69) Fliegert, R.; Glassmeier, G.; Schmid, F.; Cornils, K.; Genisyuerek, S.; Harneit, A.; Schwarz,  
600 J. R.; Guse, A. H. Modulation of Ca<sup>2+</sup> entry and plasma membrane potential by human  
601 TRPM4b. *FEBS J.* **2007**, *274*, 704–713.
- 602 (70) Babai, N.; Kanevsky, N.; Dascal, N.; Rozanski, G. J.; Singh, D. P.; Fatma, N.; Thoreson,  
603 W. B. Anion-sensitive regions of L-type CaV1.2 calcium channels expressed in HEK293  
604 cells. *PLoS One* **2010**, *5*.
- 605 (71) Hsu, K.; Han, J.; Shinlapawittayatorn, K.; Deschenes, I.; Marbán, E. Membrane potential  
606 depolarization as a triggering mechanism for Vpu-mediated HIV-1 release. *Biophys. J.*  
607 **2010**, *99*, 1718–1725.
- 608 (72) Berzingi, S.; Newman, M.; Yu, H.-G. Altering bioelectricity on inhibition of human breast

- 609 cancer cells. *Cancer Cell Int.* **2016**, *16*, 72.
- 610 (73) Wang, S. Y.; Melkounian, Z.; Woodfork, K. A.; Cather, C.; Davidson, A. G.; Wonderlin,  
611 W. F.; Strobl, J. S. Evidence for an early G1 ionic event necessary for cell cycle progression  
612 and survival in the MCF-7 human breast carcinoma cell line. *J. Cell. Physiol.* **1998**, *176*,  
613 456–464.
- 614 (74) Marino, A. A.; Iliev, I. G.; Schwalke, M. A.; Gonzalez, E.; Marler, K. C.; Flanagan, C. A.  
615 Association between cell membrane potential and breast cancer. *Tumor Biol.* **1994**, *15*, 82–  
616 89.
- 617 (75) Hammadi, M.; Chopin, V.; Matifat, F.; Dhennin-Duthille, I.; Chasseraud, M.; Sevestre, H.;  
618 Ouadid-Ahidouch, H. Human ether à-gogo K<sup>+</sup> channel 1 (hEag1) regulates MDA-MB-231  
619 breast cancer cell migration through Orai1-dependent calcium entry. *J. Cell. Physiol.* **2012**,  
620 227, 3837–3846.
- 621 (76) Thurber, A. E.; Nelson, M.; Frost, C. L.; Levin, M.; Brackenbury, W. J.; Kaplan, D. L. IK  
622 channel activation increases tumor growth and induces differential behavioral responses in  
623 two breast epithelial cell lines. *Oncotarget* **2017**, *8*, 42382–42397.

624

625 **Acknowledgments:** We thank Holly Aaron and Vadim Degtyar for expert technical assistance  
626 and training in the use of FLIM, Prof. John Kuriyan and Dr. Sean Peterson for helpful  
627 discussions, and members of the Miller lab for providing VF dyes. FLIM experiments were  
628 performed at the CRL Molecular Imaging Center, supported by NSF DBI-0116016. Cell  
629 lines were from the UCB Cell Culture Facility. FCK-QuasAr2-Citrine was a gift from  
630 Adam Cohen (Addgene plasmid # 59172). JLD was supported by an NSF Graduate

631 Research Fellowship. EWM acknowledges support from the Sloan Foundation (FG-2016-  
632 6359), March of Dimes (5-FY16-65), and the NIH (R35GM119855).

633 **Author Contributions:** JLD performed experiments, analyzed data, and wrote the paper. AMMG  
634 performed experiments and analyzed data. EWM analyzed data and wrote the paper.

635 **Competing Interest Statement:** EWM is listed as an inventor on a patent describing voltage-  
636 sensitive fluorophores. This patent is owned by the Regents of the University of California.

## 637 **Materials and Methods**

### 638 **Materials**

639 VoltageFluor dyes VF2.1.Cl and VF2.0.Cl were synthesized in house according to  
640 previously described syntheses<sup>24</sup>. Dyes were stored either as solids at room temperature or as  
641 1000x DMSO stocks at -20°C. Dye stock concentrations were normalized to the absorption of the  
642 dichlorofluorescein dye head via UV-Vis spectroscopy.

643 All salts and buffers were purchased from either Sigma-Aldrich (St. Louis, MO) or Fisher  
644 Scientific (Waltham, MA). TRAM-34, 4-aminopyridine, and charybdotoxin were purchased from  
645 Sigma-Aldrich. Gefitinib, wortmannin, sodium orthovanadate, and BAPTA-AM were purchased  
646 from Fisher Scientific. Canertinib was a gift from the Kuriyan laboratory at UC Berkeley.  
647 Gefitinib, wortmannin, canertinib, and TRAM-34 were made up as 1000x-10000x stock solutions  
648 in DMSO and stored at -20°C. Charybdotoxin was made up as a 1000x solution in water and stored  
649 at -80°C. 4-aminopyridine was made up as a 20x stock in imaging buffer (HBSS) and stored at  
650 4°C. Recombinantly expressed epidermal growth factor was purchased from PeproTech (Rocky  
651 Hill, NJ) and aliquoted as a 1 mg/mL solution in water at -80°C.

652 Solid sodium orthovanadate was dissolved in water and activated before use<sup>60</sup>. Briefly,  
653 orthovanadate solutions were repeatedly boiled and adjusted to pH 10 until the solution was clear  
654 and colorless. 200 mM activated orthovanadate stocks were aliquoted and stored at -20°C.

655 Unless otherwise noted, all imaging experiments were performed in Hank's Balanced Salt  
656 Solution (HBSS; Gibco/Thermo Fisher Scientific). HBSS composition in mM: 137.9 NaCl, 5.3  
657 KCl, 5.6 D-glucose, 4.2 NaHCO<sub>3</sub>, 1.3 CaCl<sub>2</sub>, 0.49 MgCl<sub>2</sub>, 0.44 KH<sub>2</sub>PO<sub>4</sub>, 0.41 MgSO<sub>4</sub>, 0.34  
658 Na<sub>2</sub>HPO<sub>4</sub>. High K<sup>+</sup> HBSS was made in-house to 285 mOsmol and pH 7.3, containing (in mM):  
659 120 KCl, 23.3 NaCl, 5.6 D-glucose, 4.2 NaHCO<sub>3</sub>, 1.3 CaCl<sub>2</sub>, 0.49 MgCl<sub>2</sub>, 0.44 KH<sub>2</sub>PO<sub>4</sub>, 0.41

660 MgSO<sub>4</sub>, 0.34 Na<sub>2</sub>HPO<sub>4</sub>. Nominally Ca<sup>2+</sup>/Mg<sup>2+</sup> free HBSS (Gibco) contained, in mM: 137.9 NaCl,  
661 5.3 KCl, 5.6 D-glucose, 4.2 NaHCO<sub>3</sub>, 0.44 KH<sub>2</sub>PO<sub>4</sub>, 0.34 Na<sub>2</sub>HPO<sub>4</sub>.

662

## 663 **Methods**

### 664 *Cell Culture*

665 All cell lines were obtained from the UC Berkeley Cell Culture Facility and discarded after  
666 twenty passages. Cells were maintained in Dulbecco's Modified Eagle Medium (DMEM) with 4.5  
667 g/L D-glucose supplemented with 10% FBS (Seradigm (VWR); Radnor, PA) and 2 mM  
668 GlutaMAX (Gibco) in a 5% CO<sub>2</sub> incubator at 37°C. Media for MCF-7 cells was supplemented  
669 with 1 mM sodium pyruvate (Life Technologies/Thermo Fisher Scientific) and 1x non-essential  
670 amino acids (Thermo Fisher Scientific). Media for CHO.K1 (referred to as CHO throughout the  
671 text) cells was supplemented with 1x non-essential amino acids. HEK293T and MDA-MB-231  
672 were dissociated with 0.05% Trypsin-EDTA with phenol red (Thermo Fisher Scientific) at 37°C,  
673 whereas A431, CHO, and MCF-7 cells were dissociated with 0.25% Trypsin-EDTA with phenol  
674 red at 37°C. To avoid potential toxicity of residual trypsin, all cells except for HEK293T were  
675 spun down at 250xg or 500xg for 5 minutes and re-suspended in fresh complete media during  
676 passaging.

677 For use in imaging experiments, cells were plated onto 25 mm diameter poly-D-lysine  
678 coated #1.5 glass coverslips (Electron Microscopy Sciences) in 6 well tissue culture plates  
679 (Corning; Corning, NY). To maximize cell attachment, coverslips were treated before use with 1-  
680 2 M HCl for 2-5 hours and washed overnight three times with 100% ethanol and three times with  
681 deionized water. Coverslips were sterilized by heating to 150°C for 2-3 hours. Before use,  
682 coverslips were incubated with poly-D-lysine (Sigma-Aldrich, made as a 0.1 mg/mL solution in



683 phosphate-buffered saline with 10 mM Na<sub>3</sub>BO<sub>4</sub>) for 1-10 hours at 37°C and then washed twice  
684 with water and twice with Dulbecco's phosphate buffered saline (dPBS, Gibco).

685 A431, CHO, HEK293T, and MCF-7 were seeded onto glass coverslips 16-24 hours before  
686 microscopy experiments. MDA-MB-231 cells were seeded 48 hours before use because it  
687 facilitated formation of gigaseals during whole-cell voltage clamp electrophysiology. Cell  
688 densities used for optical resting membrane potential recordings (in 10<sup>3</sup> cells per cm<sup>2</sup>) were: A431  
689 42; CHO 42; HEK293T 42; MCF-7 63; MDA-MB-231 42. To ensure the presence of single cells  
690 for whole-cell voltage clamp electrophysiology, fast-growing cells were plated more sparsely  
691 (approximately 20% confluence) for electrophysiology experiments. Cell densities used for  
692 electrophysiology (in 10<sup>3</sup> cells per cm<sup>2</sup>) were: A431 36-52; CHO 21; HEK293T 21; MCF-7 63;  
693 MDA-MB-231 42. To reduce their rapid growth rate, HEK293T cells were seeded onto glass  
694 coverslips in reduced glucose (1 g/L) DMEM with 10% FBS, 2 mM GlutaMAX, and 1 mM sodium  
695 pyruvate for electrophysiology experiments.

696

### 697 *Cellular Loading of VoltageFluor Dyes*

698 Cells were loaded with 1x VoltageFluor in HBSS for 20 minutes in a 37°C incubator with  
699 5% CO<sub>2</sub>. For most experiments, 100 nM VoltageFluor was used. Serum-starved A431 cells were  
700 loaded with 50 nM VoltageFluor. After VF loading, cells were washed once with HBSS and then  
701 placed in fresh HBSS for imaging. All imaging experiments were conducted at room temperature  
702 under ambient atmosphere. Cells were used immediately after loading the VF dye, and no cells  
703 were kept for longer than an hour at room temperature.

704

705 *Whole-Cell Patch-Clamp Electrophysiology*

706 Pipettes were pulled from borosilicate glass with filament (Sutter Instruments, Novato, CA)  
707 with resistances ranging from 4 to 7 M $\Omega$  with a P97 pipette puller (Sutter Instruments). Internal  
708 solution composition, in mM (pH 7.25, 285 mOsm/L): 125 potassium gluconate, 10 KCl, 5 NaCl,  
709 1 EGTA, 10 HEPES, 2 ATP sodium salt, 0.3 GTP sodium salt. EGTA (tetraacid form) was  
710 prepared as a stock solution in either 1 M KOH or 10 M NaOH before addition to the internal  
711 solution. Pipettes were positioned with an MP-225 micromanipulator (Sutter Instruments). A  
712 liquid junction potential of -14 mV was determined by the Liquid Junction Potential Calculator in  
713 the pClamp software package<sup>61</sup> (Molecular Devices, San Jose, CA), and all voltage step protocols  
714 were corrected for this offset.

715 Electrophysiology recordings were made with an Axopatch 200B amplifier and digitized  
716 with a Digidata 1440A (Molecular Devices). Signals were filtered with a 5 kHz low-pass Bessel  
717 filter. Correction for pipette capacitance was performed in the cell attached configuration. Voltage-  
718 lifetime calibrations were performed in V-clamp mode, with the cell held at the potential of interest  
719 for 15 or 30 seconds while lifetime was recorded. Potentials were applied in random order, and  
720 membrane test was conducted between each step to verify the quality of the patch. For single cell  
721 patching, recordings were only included if they maintained a 30:1 ratio of membrane resistance  
722 ( $R_m$ ) to access resistance ( $R_a$ ) and an  $R_a$  value below 30 M $\Omega$  throughout the recording. Due to the  
723 reduced health of HEK293T cells transfected with CAESR, recordings were used as long as they  
724 maintained a 10:1  $R_m$ : $R_a$  ratio, although most recordings were better than 30:1  $R_m$ : $R_a$ . Only  
725 recordings stable for at least 4 voltage steps (roughly 2 minutes) were included in the dataset.

726 For electrophysiology involving small groups of cells (**Fig. 2-supplement 4**), complete  
727 voltage clamp across the entire cell group was not possible. Recordings were used as long as  $R_a$

728 remained below 30 M $\Omega$  for at least three voltage steps. Most recordings also retained R<sub>m</sub>:R<sub>a</sub> ratios  
729 greater than 20:1.

730

### 731 *Epidermal Growth Factor Treatment*

732 A431 cells were serum starved prior to epidermal growth factor studies. Two days before  
733 the experiment, cells were trypsinized and suspended in complete media with 10% FBS. Cells  
734 were then spun down for 5 minutes at 500xg and re-suspended in reduced serum DMEM (2% FBS,  
735 2 mM GlutaMAX, 4.5 g/L glucose). Cells were seeded onto 25 mm coverslips in 6 well plates at  
736 a density of 84 x 10<sup>3</sup> cells per cm<sup>2</sup>. 4-5.5 hours before the experiment, the media was exchanged  
737 for serum-free DMEM (0% FBS, 2 mM GlutaMAX, 4.5 g/L glucose).

738 After 4-5.5 hours in serum-free media, cells were loaded with 50 nM VF dye as described  
739 above. In pharmacology experiments, the drug or vehicle was also added to the VF dye loading  
740 solution. All subsequent wash and imaging solutions also contained the drug or vehicle. For  
741 changes to buffer ionic composition, VoltageFluor dyes were loaded in unmodified HBSS to avoid  
742 toxicity from prolonged incubation with high K<sup>+</sup> or without Ca<sup>2+</sup>. Immediately prior to use, cells  
743 were washed in the modified HBSS (120 mM K<sup>+</sup> or 0 mM Ca<sup>2+</sup>) and recordings were made in the  
744 modified HBSS.

745 For analysis of short-term responses to EGF (3 minute time series), VF lifetime was  
746 recorded in 6 sequential 30 second exposures. Immediately after the conclusion of the first frame  
747 (30-35 seconds into the recording), EGF or vehicle (imaging buffer only) was added to the  
748 indicated final concentration from a 2x solution in HBSS imaging buffer. For analysis of long-  
749 term responses to EGF (15 minute time series), EGF addition occurred in the same way, but a gap  
750 of 150 seconds (without laser illumination) was allotted between each 30 second lifetime

751 recording. Times given throughout the text correspond to the start of an exposure. Voltage changes  
752 at 2.5 minutes were calculated from the difference between an initial image (taken before imaging  
753 buffer vehicle or EGF addition) and a final image (a 30 second exposure starting 2.5 minutes into  
754 the time series).

755

#### 756 *Transfection and Imaging of CAESR in HEK293T*

757 The CAESR plasmid was obtained as an agar stab (FCK-Quasar2-Citrine, Addgene  
758 #59172), cultured overnight in LB with 100  $\mu\text{g}/\text{mL}$  ampicillin, and isolated via a spin miniprep kit  
759 (Qiagen). HEK293T cells were plated at a density of 42,000 cells per  $\text{cm}^2$  directly onto a 6 well  
760 tissue culture plate and incubated at 37°C in a humidified incubator for 24 hours prior to  
761 transfection. Transfections were performed with Lipofectamine 3000 according to the  
762 manufacturer's protocol (Thermo Fisher Scientific). Cells were allowed to grow an additional 24  
763 hours after transfection before they were plated onto glass coverslips for microscopy experiments  
764 (as described above for electrophysiology of untransfected HEK293T cells).

765

#### 766 *Determination of $EC_{50}$ for EGF in A431 Cells*

767 Average voltage changes 2.5 minutes after addition of EGF to serum deprived A431 cells  
768 were determined at different EGF concentrations, and these means were fit to a four parameter  
769 logistic function in MATLAB (MathWorks, Natick, MA).

770

#### 771 *Goldman-Hodgkin-Katz Estimation of $V_{mem}$ in Different Imaging Buffers*

772 If intracellular and extracellular concentrations, as well as relative permeabilities, of all  
773 ionic species are known, the Goldman-Hodgkin-Katz (GHK) equation (eqn. 1) can be used to

774 calculate the resting membrane potential of a cell <sup>32</sup>. In practice, the intracellular ion concentrations  
775  $[X]_{in}$  and relative permeabilities  $P_x$  are difficult to determine. To obtain a range of reasonable  $V_{mem}$   
776 values in systems where these concentrations and relative permeabilities are not known, we  
777 calculated possible  $V_{mem}$  using the “standard” parameters derived from the work of Hodgkin and  
778 Katz <sup>32</sup>, as well as a value above and a value below each “standard” point. The values evaluated  
779 were the following:  $P_K$  1;  $P_{Na}$  0.01, 0.05, 0.2;  $P_{Cl}$  0.2, 0.45, 0.9;  $[K^+]_{in}$  90, 150, 200 mM;  $[Na^+]_{in}$  5,  
780 15, 50 mM;  $[Cl^-]_{in}$  2, 10, 35 mM. Extracellular ion concentrations  $[X]_{out}$  were known (see  
781 **Materials**). In eqn. 1,  $R$  is the universal gas constant,  $T$  is the temperature (293 K for this  
782 experiment), and  $F$  is Faraday’s constant.

$$783 \quad V_{mem} = \frac{RT}{F} \ln \frac{P_K[K^+]_{out} + P_{Na}[Na^+]_{out} + P_{Cl}[Cl^-]_{in}}{P_K[K^+]_{in} + P_{Na}[Na^+]_{in} + P_{Cl}[Cl^-]_{out}} \quad (1)$$

784

### 785 *Fluorescence Lifetime Data Acquisition*

786 Fluorescence lifetime imaging was conducted on a LSM 510 inverted scanning confocal  
787 microscope (Carl Zeiss AG, Oberkochen, Germany) equipped with an SPC-150 or SPC-150N  
788 single photon counting card (Becker & Hickl GmbH, Berlin, Germany) (**Scheme S1**). 80 MHz  
789 pulsed excitation was supplied by a Ti:Sapphire laser (MaiTai HP; SpectraPhysics, Santa Clara,  
790 CA) tuned to 958 nm and frequency-doubled to 479 nm. The laser was cooled by a recirculating  
791 water chiller (Neslab KMC100). Excitation light was directed into the microscope with a series of  
792 silver mirrors (Thorlabs, Newton, NJ or Newport Corporation, Irvine, CA).

793 Excitation light power at the sample was controlled with a neutral density (ND) wheel and  
794 a polarizer (P) followed by a polarizing beamsplitter (BS). Light was titrated such that  
795 VoltageFluor lifetime did not drift during the experiment, no phototoxicity was visible, and photon  
796 pile-up was not visible on the detector. For recordings at high VoltageFluor concentrations (**Fig.**

797 **1-supplement 3, Fig. 2-supplement 5**), reduced power was used to avoid saturating the detector.  
798 For optical voltage determinations using 50 or 100 nM VoltageFluor, typical average power at the  
799 sample was 5  $\mu$ W.

800 Fluorescence emission was collected through a 40x oil immersion objective (Zeiss) coated  
801 with immersion oil (Immersol 518F, Zeiss). Emitted photons were detected with a hybrid detector,  
802 HPM-100-40 (Becker & Hickl), based on a Hamamatsu R10467 GaAsP hybrid photomultiplier  
803 tube. Detector dark counts were kept below 1000 per second during acquisition. Emission light  
804 was collected through a 550/49 bandpass filter (Semrock, Rochester, NY) after passing through a  
805 488 LP dichroic mirror (Zeiss). The reference photons for determination of photon arrival times  
806 were detected with a PHD-400-N high speed photodiode (Becker & Hickl). Data were acquired  
807 with 256 time bins in the analog-to-digital-converter and either 64x64 or 256x256 pixels of spatial  
808 resolution (see discussion of pixel size below).

809 Routine evaluation of the proper functioning of the lifetime recording setup was performed  
810 by measurement of three standards (**Fig. 1-supplement 2**): 2  $\mu$ M fluorescein in 0.1 N NaOH, 1  
811 mg/mL erythrosin B in water (pH 7), and the instrument response function (IRF). The IRF was  
812 determined from a solution of 500  $\mu$ M fluorescein and 12.2 M sodium iodide in 0.1 N NaOH.  
813 Because of the high concentration of iodide quencher, the IRF solution has a lifetime shorter than  
814 the detector response time, allowing approximation of the instrument response function under  
815 identical excitation and emission conditions as data acquisition<sup>62</sup>.

816

817 **Scheme S1. Optical diagram for time correlated single photon counting microscope.**

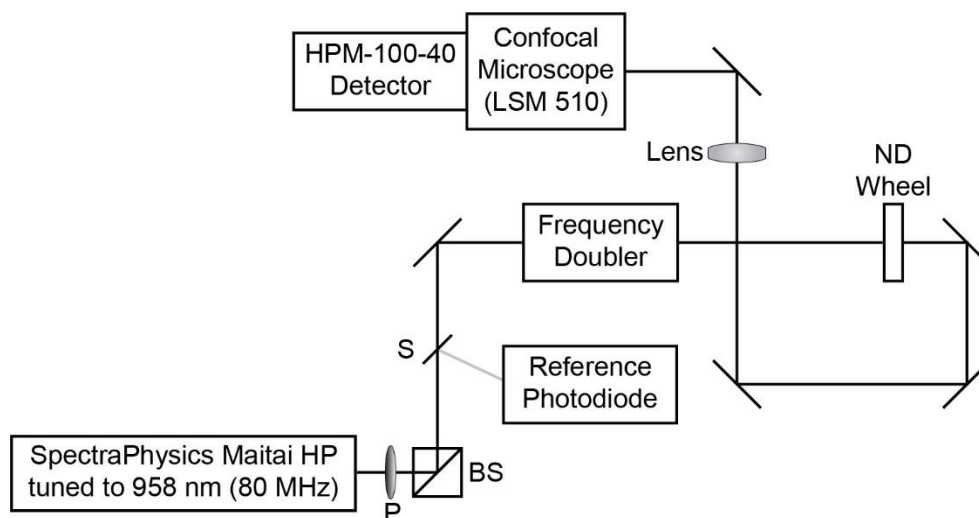

818

819 **Scheme S1.** Optical diagram for time correlated single photon counting microscope. Excitation

820 light was supplied by a Ti:Sapphire laser tuned to 958 nm. A small amount of light was redirected

821 by a beam sampler (S) to a reference photodiode. The remaining light was passed through a

822 frequency doubler to obtain 479 nm excitation light, which entered the LSM510 confocal

823 microscope. A polarizer (P) followed by a polarizing beamsplitter (BS), as well as a neutral density

824 (ND) wheel, allowed control of the amount of light passed to the sample.

825

826 Fluorescence Lifetime Data Processing and Conversion to Voltage

827 **Scheme S2: Overview of data processing to obtain membrane potential recordings from**  
 828 **fluorescence lifetime.**

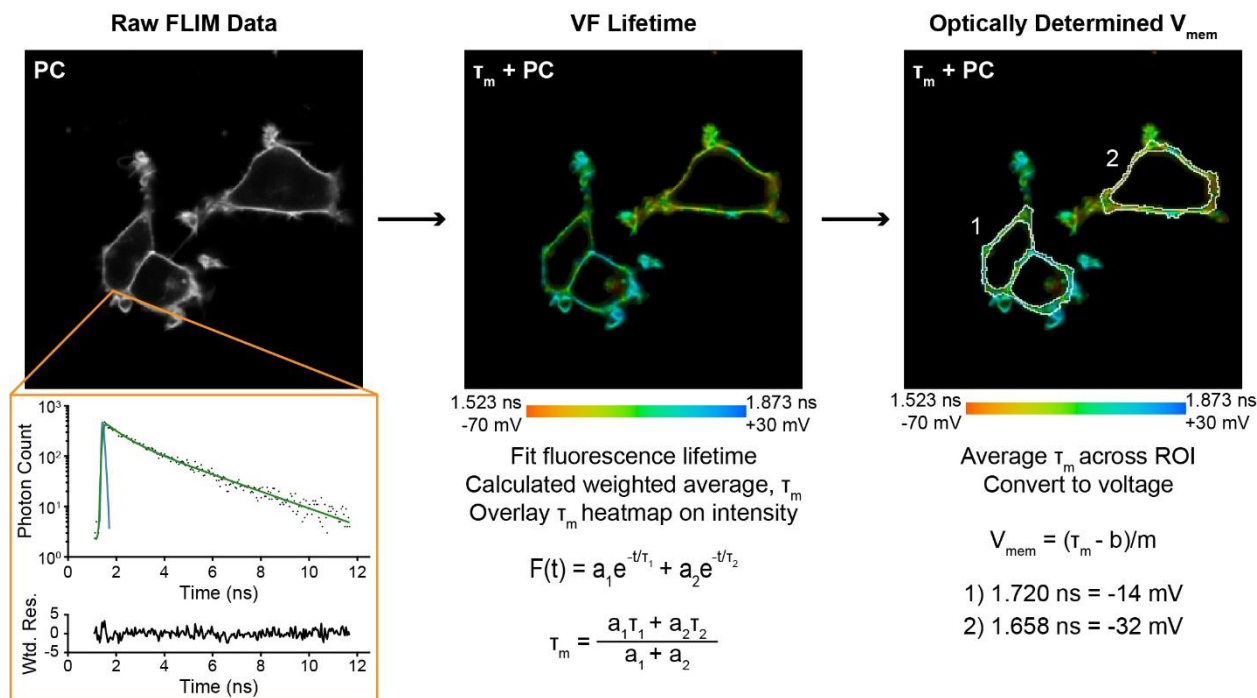

829

830 **Scheme S2.** Overview of data processing to obtain membrane potential recordings from  
 831 fluorescence lifetime. Time-correlated photon data (black dots, first panel) collected at each pixel  
 832 were fit to an exponential decay model (green) with iterative reconvolution of the instrument  
 833 response function (IRF, blue). The two components of the fluorescence lifetimes were converted  
 834 to a weighted average (middle panel). Cell membranes (white outlines) were identified, and  $\tau_m$  was  
 835 averaged within each of these regions of interest (ROIs, right panel). These lifetimes were then  
 836 converted to voltage via a previously determined lifetime- $V_{mem}$  standard curve with slope  $m$  and  
 837 y-intercept  $b$ . Additional details of this process are provided in the text below. Wtd. Res.: weighted  
 838 residuals of the fit,  $\tau_m$ : weighted average fluorescence lifetime, PC: photon count.  $\tau_m + PC$   
 839 represents an overlay of the lifetime data (color heat map) onto the photon count image.

840



841 *IRF Deconvolution*

842 Signal from photons detected in a TCSPC apparatus are convolved with the instrument  
843 response (IRF). IRFs can be approximated by the SPCImage fitting software, but consistency of  
844 lifetime fits on VF-FLIM datasets was improved by using a measured IRF. Measured IRFs were  
845 incorporated by the iterative reconvolution method using SPCImage analysis software<sup>63</sup>.

846

847 *VoltageFluor Lifetime Fitting Model*

848 All VoltageFluor lifetime data were fit using SPCImage (Becker & Hickl), which solves  
849 the nonlinear least squares problem using the Levenberg-Marquadt algorithm. VF2.1.Cl lifetime  
850 data were fit to a sum of two exponential decay components (eqn. 2). Attempts to fit the VF2.1.Cl  
851 data with a single exponential decay (eqn. 3) were unsatisfactory.

852

854 
$$F(t) = a_1 e^{-t/\tau_1} + a_2 e^{-t/\tau_2} \quad (2)$$

853

855 The fluorescence lifetime of VF2.0.Cl was adequately described by a single exponential  
856 decay for almost all data (eqn. 3). A second exponential component was necessary to fit data at  
857 VF2.0.Cl concentrations above 500 nM, likely attributable to the concentration-dependent  
858 decrease in lifetime that was observed high VF concentrations.

859

860 
$$F(t) = a e^{-t/\tau} \quad (3)$$

861

862 For all data fit with the two component model, the weighted average of the two lifetimes,  
863  $\tau_m$  (eqn. 4), was used in subsequent analysis.

864

865 
$$\tau_m = \frac{a_1\tau_1 + a_2\tau_2}{a_1 + a_2} \quad (4)$$

866

867 All lifetime images are represented as an overlay of photon count (pixel intensity) and  
868 weighted average lifetime (pixel color) throughout the text ( $\tau_m + \text{PC}$ , **Scheme S2**). Pixels with  
869 insufficient signal to fit a fluorescence decay are shown in black. The photon counts, as well as  
870 the lifetimes, in image sequences on the same set of cells are scaled across the same range.

871

872 *Additional Fit Parameters for VoltageFluor Lifetimes*

873 Pixels with photon counts below 300 (VF2.1.Cl) or 150 (VF2.0.Cl) photons at the peak of  
874 the decay (time bin with the most signal) were omitted from analysis to ensure reproducible fits.  
875 Because the lifetime of VFs does not fully decay to baseline in a single 12.5 ns laser cycle, the  
876 incomplete multiexponentials fitting option was used, allowing the model to attribute some signal  
877 early in the decay to the previous laser cycle. Out of 256 time bins from the analog-to-digital  
878 converter (ADC), only data from time bins 23 to 240 were used in the final fit. The offset parameter  
879 (detector dark counts per ADC time bin per pixel) was set to zero. The number of iterations for the  
880 fit in SPCImage was increased to 20 to obtain converged fits. Shift between the IRF and the decay  
881 trace was fixed to 0.5 (in units of ADC time bins), which consistently gave lifetimes of standards  
882 erythrosin B (1 mg/mL in H<sub>2</sub>O)<sup>64</sup> and fluorescein (2  $\mu\text{M}$  in 0.1 N NaOH, H<sub>2</sub>O)<sup>27</sup> closest to reported  
883 values (**Fig. 1 – supplement 2**).

884

885 *Effective Pixel Size*

886 To obtain sufficient photons but keep excitation light power minimal, binning between  
887 neighboring pixels was employed during fitting. This procedure effectively takes the lifetime as a  
888 spatial moving average across the image by including adjacent pixels in the decay for a given pixel.

| Data Type                          | Acquired Pixel Width ( $\mu\text{m}$ ) | Binned Pixel Width ( $\mu\text{m}$ ) |
|------------------------------------|----------------------------------------|--------------------------------------|
| Single Image – Concentration Curve | 0.44                                   | 3.08                                 |
| Single Image – RMP Distributions   | 1.24                                   | 8.68                                 |
| Electrophysiology Recording        | 1.00                                   | 3.01                                 |
| EGF Time Series                    | 0.88                                   | 2.64                                 |

889 **Pixel Sizes.** For each recording type, the width of each pixel at acquisition is reported, as well as  
890 the width of the area included in the binned lifetime signal during fitting. All pixels are square.

891

892 *Determination of Regions of Interest*

893 Images were divided into cell groups, with each cell group as a single region of interest  
894 (ROI). ROIs were determined from photon count images, either manually from the cell  
895 morphology in ImageJ or automatically by sharpening and then thresholding the signal intensity  
896 with custom MATLAB code. Regions of images that were partially out of the optical section or  
897 contained punctate debris were omitted. Sample ROIs are shown in **Scheme S2**.

898 For cells that adjoin other cells, attribution of a membrane region to one cell versus the  
899 other is not possible. As such, we chose to interpret each cell group as an independent sample ('n')  
900 instead of extracting  $V_{\text{mem}}$  values for individual cells. Adjacent cells in a group are electrically  
901 coupled to varying degrees, and their resting membrane potentials are therefore not independent  
902 <sup>31</sup>. While this approach did not fully utilize the spatial resolution of VF-FLIM, it prevented  
903 overestimation of biological sample size for the effect in question.

904

## 905 *Conversion of Lifetime to Transmembrane Potential*

906 The mean  $\tau_m$  across all pixels in an ROI was used as the lifetime for that ROI. Lifetime  
907 values were mapped to transmembrane potential via the lifetime- $V_{mem}$  standard curves determined  
908 with whole-cell voltage-clamp electrophysiology. For electrophysiology measurements, the  
909 relationship between the weighted average lifetime (eqn. 4) and membrane potential for each  
910 patched cell was determined by linear regression, yielding a sensitivity ( $m$ , ps/mV) and a 0 mV  
911 lifetime ( $b$ , ps) for each cell (eqn. 5). The average sensitivity and 0 mV point across all cells of a  
912 given type were used to convert subsequent lifetime measurements ( $\tau$ ) to  $V_{mem}$  (**Figure 2-**  
913 **supplement 3**, eqn. 6). For quantifying changes in voltage ( $\Delta V_{mem}$ ) from changes in lifetime ( $\Delta\tau$ ),  
914 only the average sensitivity is necessary (eqn. 7).

915

$$916 \quad \tau = m * V_{mem} + b \quad (5)$$

917

$$918 \quad V_{mem} = \frac{(\tau - b)}{m} \quad (6)$$

919

$$920 \quad \Delta V_{mem} = \frac{(\Delta\tau)}{m} \quad (7)$$

921

922 Where standard error of the mean of a voltage determination ( $\delta V_{mem}$ ) is given, error was  
923 propagated to include the standard errors of the slope ( $\delta m$ ) and y-intercept ( $\delta b$ ) of the voltage  
924 calibration, as well as the standard error of the lifetime measurements ( $\delta\tau$ ) in the condition of  
925 interest (eqn. 8). For error in a voltage change ( $\delta\Delta V_{mem}$ ), only error in the calibration slope was  
926 included in the propagated error (eqn. 9). Where standard deviation of VF-FLIM derived  $V_{mem}$

927 values is shown, a similar error propagation procedure was applied, using the standard deviation  
928 of the average sensitivity and 0 mV lifetime for that cell line.

$$930 \quad \delta V_{mem} = |V_{mem}| \sqrt{\left(\frac{\sqrt{\delta\tau^2 + \delta b^2}}{\tau - b}\right)^2 + \left(\frac{\delta m}{m}\right)^2} \quad (8)$$

929

$$932 \quad \delta\Delta V_{mem} = |\Delta V_{mem}| \sqrt{\left(\frac{\delta\Delta\tau}{\Delta\tau}\right)^2 + \left(\frac{\delta m}{m}\right)^2} \quad (9)$$

931

### 933 *Resolution of VF-FLIM Voltage Determination*

934 The intrinsic nature of fluorescence lifetime introduces a point of reference into the voltage  
935 measurement, from which a single lifetime image can be interpreted as resting membrane potential.  
936 The reproducibility of this reference point (reported here as the 0 mV lifetime) over time and across  
937 cells determines the accuracy of optical  $V_{mem}$  measurements. Because the sensitivities exhibited  
938 little variability within each cell type, the slope parameter contributes very little to the overall error.

939 The amount of voltage-independent noise in VF-FLIM can be estimated from lifetime-  
940  $V_{mem}$  calibration data. We report resolution as the root-mean-square deviation (RMSD) of the  
941 optically calculated voltage ( $V_{FLIM}$ ) from the voltage set by whole-cell voltage clamp ( $V_{ephys}$ ). The  
942 RMSD of  $n$  measurements (eqn. 10) can be determined from the variance  $\sigma^2$  (eqn. 11) and the bias  
943 (eqn. 12) of the estimator (in this case, VF-FLIM) relative to the “true” value (in this case,  
944 electrophysiology).

$$945 \quad RMSD = \sqrt{\sigma^2 + Bias^2} \quad (10)$$

$$946 \quad \sigma^2 = \frac{1}{n} \sum_{i=1}^n (V_{FLIM,i} - V_{ephys,i})^2 \quad (11)$$

947 
$$Bias = \frac{1}{n} \sum_{i=1}^n V_{FLIM,i} - \frac{1}{n} \sum_{i=1}^n V_{ephys,i} \quad (12)$$

948 The voltage-independent variations in lifetime are much larger between cells than within a  
949 cell. Therefore, the error in tracking the magnitude of voltage changes on an individual cell (“intra-  
950 cell” comparisons) is much lower than the error in making a comparison of absolute  $V_{mem}$  between  
951 two cells (“inter-cell” comparisons). We can therefore determine an “intra-cell” RMSD and an  
952 “inter-cell” RMSD to reflect the voltage resolution of these two types of measurements. To  
953 calculate “intra-cell” error, we look at the RMSD between  $V_{ephys}$  and  $V_{FLIM}$  using the  $\tau_{fl}$ - $V_{mem}$   
954 relationship *for that specific cell*. Phrased another way, we are looking at the amount of error that  
955 would be expected in estimating a new  $V_{mem}$  for a cell based on a previous, optically-determined  
956 potential at that cell (i.e. changes in voltage). By averaging these “intra cell” RMSD values across  
957 all cells of a given type, we estimate the single-trial resolution for quantifying voltage changes is  
958 at or below 5 mV (**Fig. 2-supplement 3**).

959 The error in the absolute membrane potential determination (“inter-cell”) is calculated here  
960 as the RMSD between the y-intercept (0 mV lifetime) of all of the individual cells’ lifetime-voltage  
961 relationships and the 0 mV value for the averaged calibration *for all cells of a given type*. This  
962 metric addresses how well the lifetime- $V_{mem}$  relationship for a given cell type is likely to represent  
963 an individual cell’s lifetime- $V_{mem}$  relationship. This “inter cell” RMSD ranged from 11 to 24 mV  
964 for the tested cell lines (**Fig. 2-supplement 3**). Because of the improved throughput of VF-FLIM,  
965 much smaller errors for a population value of  $V_{mem}$  can be obtained by and averaging  $V_{mem}$   
966 recordings from multiple cells.

967 This method of calculating error assumes that the electrophysiology measurement is  
968 perfectly accurate and precise. Realistically, it is likely that some of the variation seen is due to

969 the quality of the voltage clamp. As a result, these RMSD values provide a conservative upper  
970 bound for the voltage errors in VF-FLIM.

971

### 972 *Analysis of CAESR Lifetimes*

973 For sample images of CAESR in HEK293T (**Fig. 1-supplement 5**), fluorescence decays  
974 were fit using SPCImage to a biexponential decay model as described for VF2.1.Cl above, using  
975 a peak photon threshold of 150 and a bin of 2 (binned pixel width of 5  $\mu\text{m}$ ). To better match the  
976 studies by Cohen and co-workers<sup>21</sup>, which isolated the membrane fluorescence from cytosolic  
977 fluorescence by directing the laser path, the lifetime-voltage relationships were not determined  
978 with these square-binned images. Instead, membranes were manually identified, and the  
979 fluorescence decays from all membrane pixels were summed together before fitting once per cell.  
980 (This is in contrast to the processing of VoltageFluor data, where the superior signal to noise and  
981 localization enables fitting and analysis of the lifetime on a pixel by pixel basis). This “one fit per  
982 membrane” analysis of CAESR was performed in custom MATLAB code implementing a Nelder-  
983 Meade algorithm, in which CAESR data were fit to a biexponential model with the offset fixed to  
984 0 and the color shift as a free parameter.

985

986 **Supplementary Information**

987

988 Supplementary Information for:

989

990 Optical determination of absolute membrane potential

991

992 Julia R. Lazzari-Dean, Anneliese M. M. Gest, Evan W. Miller

993

994



995 *Figure 1 Supplements*

996 **Fig. 1, S1. Comparison of available approaches for measuring membrane potential in cells.**

|                                                                            | <b>Patch-clamp electrophysiology</b>    | <b>Single color fluorescence intensity imaging</b> | <b>Ratio-calibrated fluorescence sensors (FRET-oxonol)</b> | <b>GEVI-based FLIM approaches</b>        | <b>FLIM with VoltageFluors (VF-FLIM, this work)</b> |
|----------------------------------------------------------------------------|-----------------------------------------|----------------------------------------------------|------------------------------------------------------------|------------------------------------------|-----------------------------------------------------|
| <b>Absolute <math>V_{mem}</math> resolution (between cell comparisons)</b> | excellent                               | none <sup>a</sup>                                  | very poor <sup>b</sup>                                     | very poor <sup>c</sup>                   | good                                                |
| <b>Quantification of <math>V_{mem}</math> changes on a given cell</b>      | excellent                               | none <sup>a</sup>                                  | poor <sup>b</sup>                                          | poor <sup>c</sup>                        | excellent                                           |
| <b>Compatibility with long time scales</b>                                 | poor <sup>d</sup>                       | poor <sup>e</sup>                                  | good <sup>f</sup>                                          | good                                     | good                                                |
| <b>Temporal resolution</b>                                                 | sub-millisecond                         | ~1 ms <sup>g</sup>                                 | 2-500 ms <sup>h</sup>                                      | seconds <sup>g</sup>                     | seconds <sup>g</sup>                                |
| <b>Minimal invasiveness, damage</b>                                        | very poor <sup>d</sup>                  | excellent                                          | poor <sup>i</sup>                                          | excellent                                | excellent                                           |
| <b>Throughput (cells/day)</b>                                              | 10s                                     | 1000s                                              | 1000s                                                      | 1000s                                    | 1000s                                               |
| <b>Spatial resolution</b>                                                  | Single value per electrode <sup>j</sup> | Subcellular                                        | Subcellular                                                | Single value per laser path <sup>k</sup> | Single cell <sup>l</sup>                            |

997 <sup>a</sup>Measurements vary too much to be converted to absolute voltage or interpreted across populations  
 998 of cells. This variability is attributable to numerous confounding factors, including dye loading,  
 999 photobleaching, and sample movement <sup>9</sup>.

1000 <sup>b</sup>While in principle less variable than a single-color fluorescence intensity measurement, in  
 1001 practice, the signal depends strongly on the loading of two independent lipophilic indicators <sup>12,65</sup>,  
 1002 which can vary substantially.

1003 <sup>c</sup>Poor protein trafficking leads to large amounts of non-voltage-sensitive signal, which  
 1004 contaminates the FLIM recording. Voltage-equivalent resolution on a single cell (intra-cell) was  
 1005 30 mV; comparisons between cells (inter-cell) show voltage-equivalent resolution of 400 mV (**Fig.**  
 1006 **1-supplement 5, Methods**).

1007 <sup>d</sup>Patch-clamp electrophysiology requires physical contact with the cell of interest, which causes  
1008 damage to the cell and, in whole cell configurations, washout of intracellular factors. Slight  
1009 movement of the cell or sample generally result in loss of the patch.

1010 <sup>e</sup>Movement of the cell and photobleaching of the dye both cause large changes to the signal over  
1011 seconds to minutes.

1012 <sup>f</sup>Ratio-calibrated imaging approaches use a second signal (usually another color of fluorescence)  
1013 to correct for the cell movement that contaminates single-color intensity signals over time. If the  
1014 rate of photobleaching is the same for both components, photobleaching artifacts can also be  
1015 avoided.

1016 <sup>g</sup>Limited by photon count rates. Large numbers of photons per pixel must be collected to fit TCSPC  
1017 FLIM data, leading to slower acquisition speeds.

1018 <sup>h</sup>Limited by probe movement in the membrane, which depends mostly on lipophilicity <sup>11</sup>.

1019 <sup>i</sup>Toxicity from capacitive load of the sensor <sup>11</sup>.

1020 <sup>j</sup>The spatial resolution of electrophysiology is compromised by space clamp error, preventing  
1021 interpretation of  $V_{\text{mem}}$  in regions far from the electrode (e.g. many neuronal processes) <sup>29,30</sup>.

1022 <sup>k</sup>As demonstrated by Cohen and co-workers <sup>20,21</sup>; in our hands with CAESR, we also experienced  
1023 significant improvements in voltage resolution by fitting a single curve per FLIM image instead  
1024 of processing the images pixel-wise (see **Methods**)

1025 <sup>l</sup>In this work, we calibrated VF-FLIM for  $V_{\text{mem}}$  measurements with single cell resolution. In  
1026 principle, subcellular spatial resolution could be achieved with the VF-FLIM technique.

1027 **Fig. 1, S2. Properties of lifetime standards and VoltageFluor dyes.**

|              | $\% \Delta F/F$ | $\% \Delta \tau/\tau$ | Lifetime (ns)     |
|--------------|-----------------|-----------------------|-------------------|
| Fluorescein  | N/A             | N/A                   | $4.008 \pm 0.009$ |
| Erythrosin B | N/A             | N/A                   | $0.083 \pm 0.001$ |
| VF2.1.Cl     | 27              | $22.4 \pm 0.4\%$      | $1.77 \pm 0.02$   |
| VF2.0.Cl     | 0               | $0.11 \pm 0.05\%$     | $3.482 \pm 0.004$ |

1028 **Fig. 1, S2.** Properties of lifetime standards and VoltageFluor dyes. Fluorescein and erythrosin B  
1029 standards were measured in drops of solution placed on a coverslip. For VF dyes, voltage  
1030 sensitivities from intensity-based fluorescence imaging in HEK293T cells ( $\% \Delta F/F$ , percent change  
1031 in fluorescence intensity for a voltage step from -60 mV to +40 mV) are from previously published  
1032 work <sup>24</sup>. Lifetime data were obtained from voltage-clamp electrophysiology of HEK293T cells  
1033 loaded with 100 nM VF. Lifetime listed here is the average 0 mV lifetime from the  
1034 electrophysiology calibration.  $\% \Delta \tau/\tau$  is the percent change in lifetime corresponding to a 100 mV  
1035 step from -60 mV to +40 mV. Lifetime sample sizes: fluorescein 25, erythrosin B 25, VF2.1.Cl  
1036 17, VF2.0.Cl 17. For lifetime standards, each measurement was taken on a separate day. VF2.1.Cl  
1037 data in HEK293T is duplicated in **Figure 2 – supplement 3**. Values are tabulated as mean  $\pm$  SEM.

1038 **Fig. 1, S3. Concentration dependence of VoltageFluor lifetimes in HEK293T cells.**

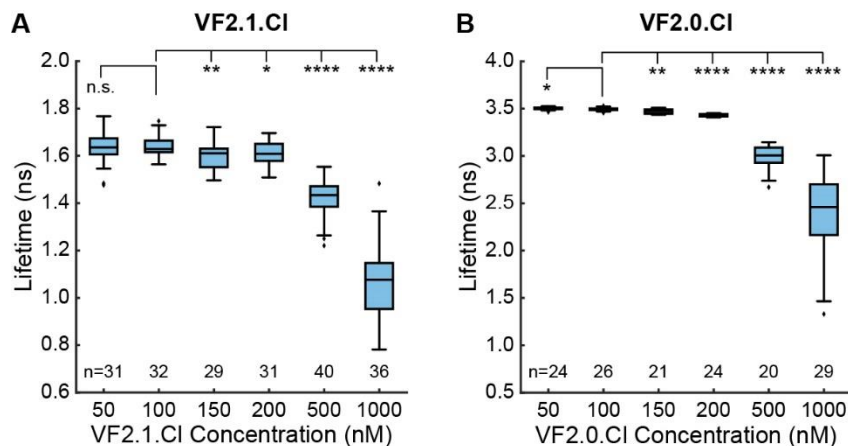

1039

1040 **Fig. 1, S3. Concentration dependence of VoltageFluor lifetimes in HEK293T cells. Changes in**

1041 **lifetime arising from addition of a range of concentrations of (A) VF2.1.Cl or (B) voltage-**

1042 **insensitive control VF2.0.Cl in HEK293T cells. Biexponential fit models were used for all**

1043 **VF2.1.Cl concentrations and 1  $\mu$ M VF2.0.Cl; a monoexponential model was used for all other**

1044 **VF2.0.Cl concentrations. Box plots represent the interquartile range, with whiskers and outliers**

1045 **determined with the Tukey method. Sample sizes indicate number of cell groups. Data were**

1046 **obtained over 2 to 4 different days from a total of 3 or 4 coverslips at each concentration. Asterisks**

1047 **indicate significant differences between the indicated concentration and the VF concentration used**

1048 **for electrophysiology experiments (n.s.  $p > 0.05$ , \*  $p < 0.05$ , \*\*  $p < 0.01$ , \*\*\*  $p < 0.001$ , \*\*\*\*  $p <$**

1049 **0.0001, two-sided, unpaired, unequal variances t-test).**

1050 **Fig. 1, S4. VF2.0.Cl lifetime does not depend on membrane potential.**

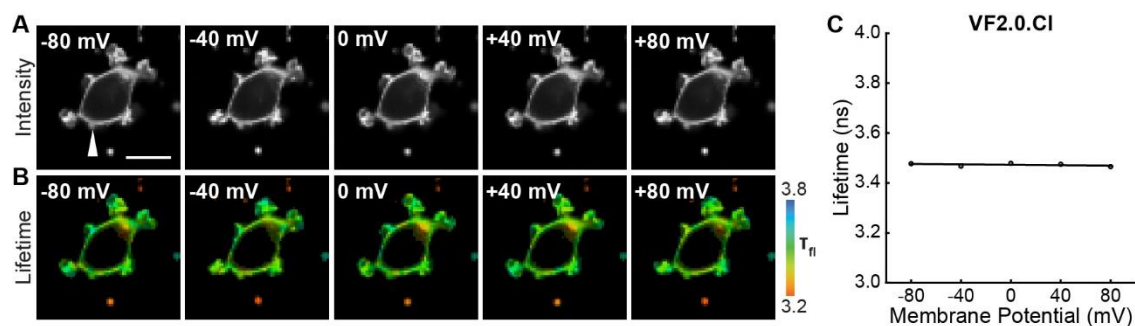

1051  
1052 **Fig. 1, S4. VF2.0.Cl lifetime does not depend on membrane potential. (A)** Photon count and **(B)**  
1053 lifetime images of a single HEK293T cell loaded with 100 nM VF2.0.Cl, with the membrane  
1054 potential held at the indicated value via whole-cell voltage clamp electrophysiology. White arrow  
1055 indicates patch pipette. Scale bar is 20  $\mu$ m. **(C)** Quantification of images shown in **(B)** for this  
1056 individual cell. Black line is the line of best fit.

1057 **Fig. 1, S5. The GEVI CAESR shows variable lifetime-voltage relationships.**

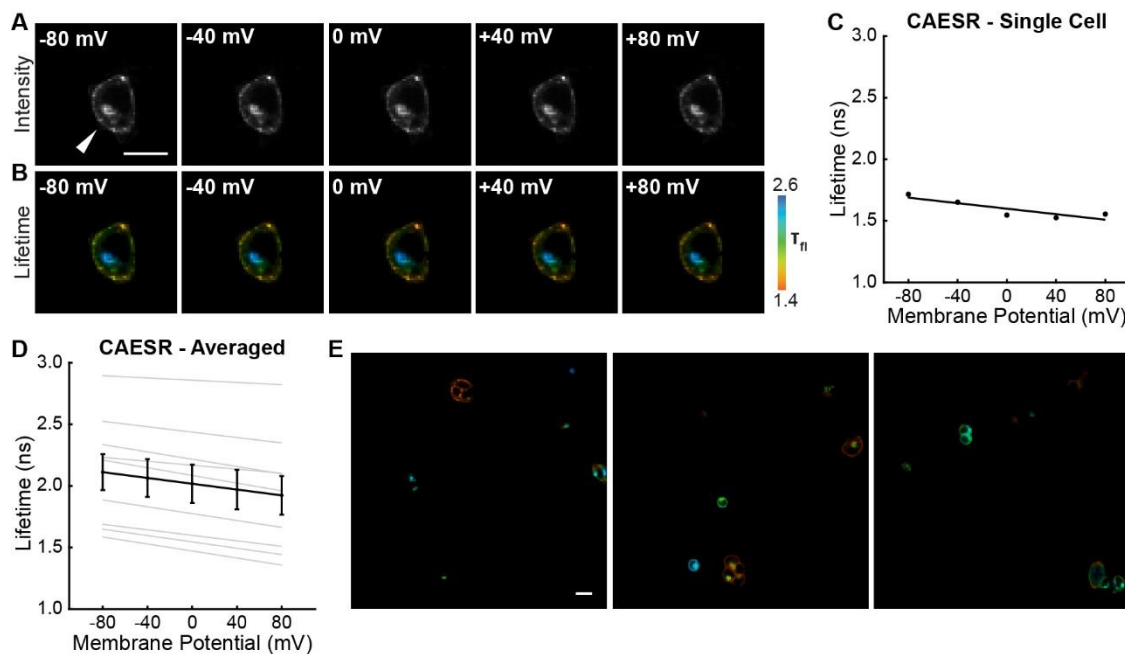

1058

1059 **Fig. 1, S5. The GEVI CAESR shows variable lifetime-voltage relationships.** (A) Photon count and  
1060 (B) lifetime images of a HEK293T cell expressing CAESR and held at the indicated  $V_{mem}$  with  
1061 voltage-clamp electrophysiology. White arrow indicates voltage-clamped cell. (C) Lifetime- $V_{mem}$   
1062 relationship from the cell in (B), based on a single fit from combined fluorescence decays of all  
1063 pixels in the cell membrane at each potential (see **Methods**). Points indicate recordings at a given  
1064 potential; solid line is line of best fit. (D) Evaluation of VF2.1.Cl lifetime-voltage relationships in  
1065 many individual CAESR-expressing HEK293T cells. Gray lines represent linear fits on individual  
1066 cells. Black line is the average fit across all cells (n=9). (E) Representative lifetime images of  
1067 CAESR in HEK293T cells. Scale bars represent 20  $\mu$ m.

1068 Figure 2 Supplements

1069 Fig. 2, S1. VoltageFluor lifetime reports voltage in various cell types.

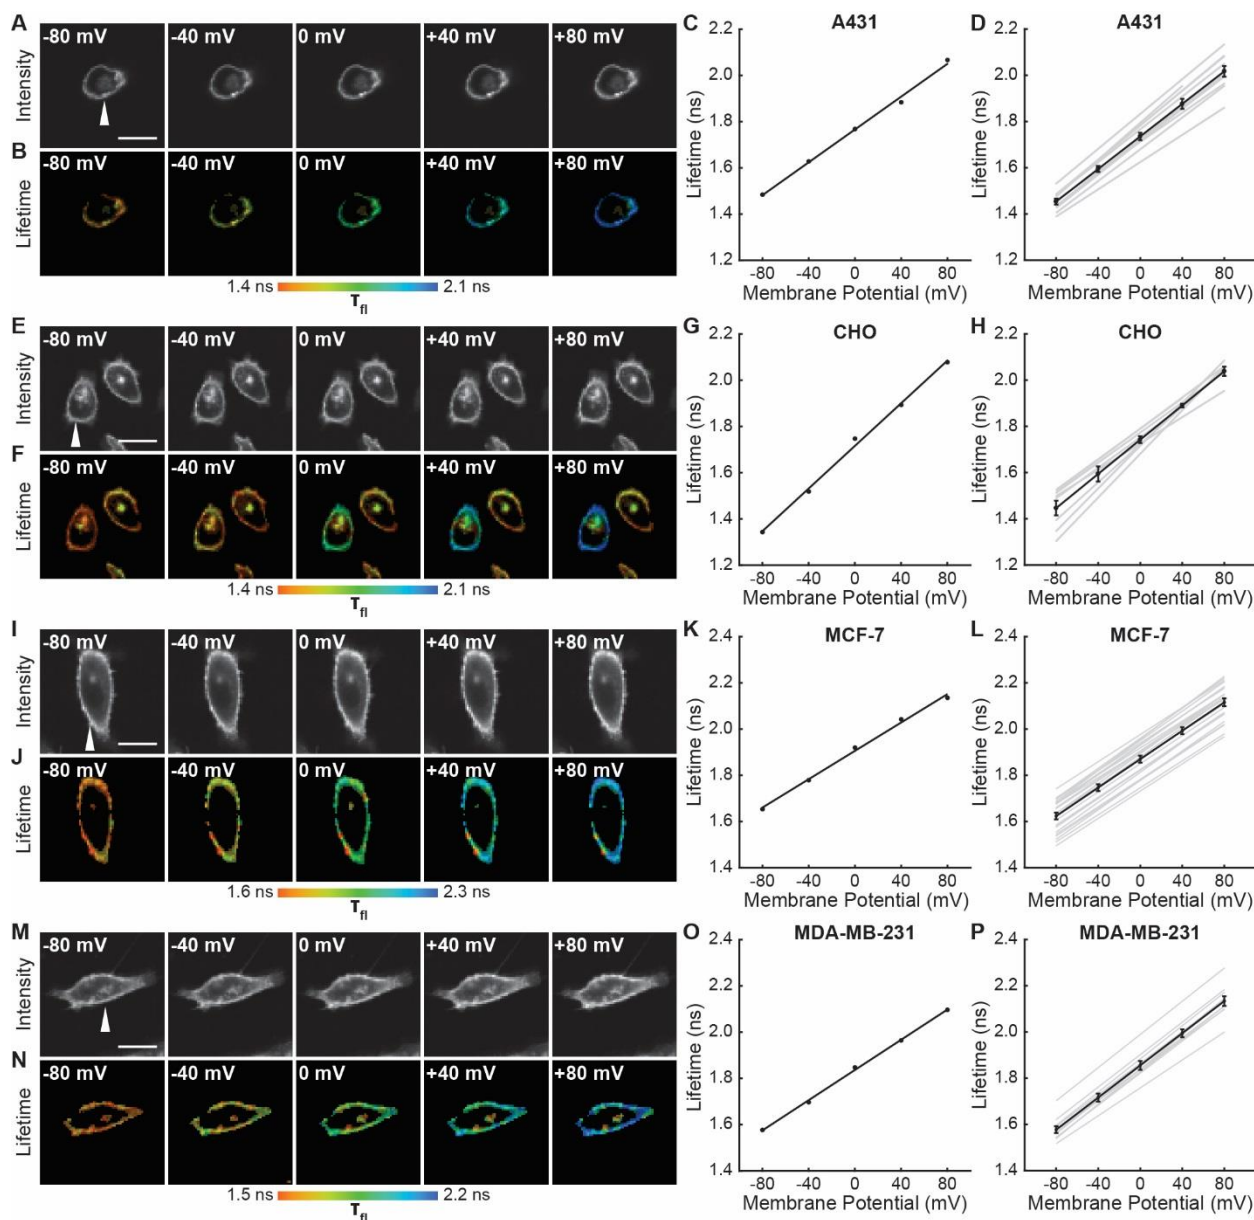

1070

1071 **Fig. 2, S1.** VoltageFluor lifetime reports voltage in various cell types. (A) Representative photon  
1072 count and (B) lifetime images of a VF2.1.Cl in A431 cells with  $V_{mem}$  held at the indicated value  
1073 with voltage-clamp electrophysiology. A431 cells were not serum starved for these experiments.  
1074 (C) Quantification of the images in (B), with the line of best fit for this single trial. (D) Lines of

1075 best fit for the lifetime- $V_{\text{mem}}$  relationships of 12 A431 cells (gray lines). Average lifetime at each  
1076 potential is shown as mean  $\pm$  SEM, with the average line of best fit in black. **(E)-(H)** Lifetime-  
1077  $V_{\text{mem}}$  standard curve determination in CHO cells (n=8). **(I)-(L)** Lifetime- $V_{\text{mem}}$  standard curve  
1078 determination in MCF-7 cells (n=24). **(M)-(P)** Lifetime- $V_{\text{mem}}$  standard curve determination in  
1079 MDA-MB-231 cells (n=11). VF2.1.Cl concentration was 100 nM in all cases. White arrows  
1080 indicates the voltage-clamped cell. Scale bars are 20  $\mu\text{m}$ .



1081 **Fig. 2, S2. Additional parameters of lifetime-voltage standard curves.**

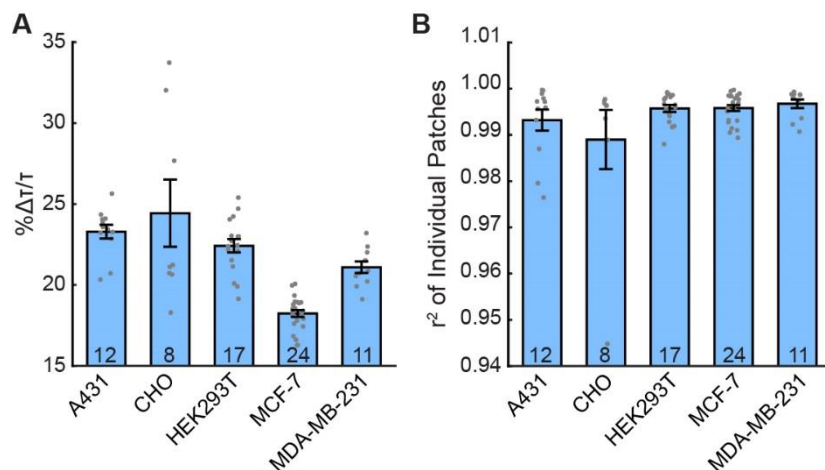

1082

1083 **Fig. 2, S2. Additional parameters of lifetime-voltage standard curves. (A)** Percent change in  
1084 VF2.1.Cl lifetime per 100 mV change in voltage, relative to the lifetime at -60 mV. **(B)** Correlation  
1085 coefficients ( $r^2$ ) for all of the lines of best fit of VF2.1.Cl lifetime versus membrane potential.  
1086 Values shown are mean  $\pm$  S.E.M., with gray dots indicating values from individual patches.

1087 **Fig. 2, S3. Lifetime- $V_{\text{mem}}$  standard curves for VF2.1.Cl lifetime in various cell lines.**

| Cell Type         | Slope (ps/mV)   | 0 mV lifetime (ns) | $\% \Delta \tau / \tau$ | RMSD, intra-cell (mV) | RMSD, inter-cell (mV) |
|-------------------|-----------------|--------------------|-------------------------|-----------------------|-----------------------|
| <b>A431</b>       | $3.55 \pm 0.08$ | $1.74 \pm 0.02$    | $23.3 \pm 0.4\%$        | $4.3 \pm 0.7$         | 16                    |
| <b>CHO</b>        | $3.68 \pm 0.25$ | $1.74 \pm 0.01$    | $24 \pm 2\%$            | $5.4 \pm 1.5$         | 11                    |
| <b>HEK293T</b>    | $3.50 \pm 0.08$ | $1.77 \pm 0.02$    | $22.4 \pm 0.4\%$        | $4.1 \pm 0.4$         | 20                    |
| <b>MCF-7</b>      | $3.07 \pm 0.03$ | $1.87 \pm 0.01$    | $18.2 \pm 0.2\%$        | $3.8 \pm 0.3$         | 24                    |
| <b>MDA-MB-231</b> | $3.47 \pm 0.06$ | $1.86 \pm 0.02$    | $21.1 \pm 0.4\%$        | $3.3 \pm 0.5$         | 17                    |

1088

1089 **Fig. 2, S3.** Lifetime- $V_{\text{mem}}$  standard curves for VF2.1.Cl lifetime in various cell lines. Whole-cell  
1090 voltage-clamp electrophysiology was used to determine the relationship between VF2.1.Cl  
1091 lifetime and membrane potential in five different cell lines. Parameters of this linear model are  
1092 listed above. The  $\% \Delta \tau / \tau$  is the percent change in the lifetime observed for a voltage step from -60  
1093 mV to +40 mV. The intra-cell RMSD represents the accuracy for quantifying voltage changes in  
1094 a particular cell (see **Methods**). The inter-cell RMSD represents the expected variability in single-  
1095 trial absolute  $V_{\text{mem}}$  determinations. Sample sizes: A431 12, CHO 8, HEK293T 17, MCF-7 24,  
1096 MDA-MB-231 11. All values are tabulated as mean  $\pm$  SEM.

1097 **Fig. 2, S4. Relationship between lifetime and membrane potential extends to groups of cells**  
 1098 **and across culture conditions.**

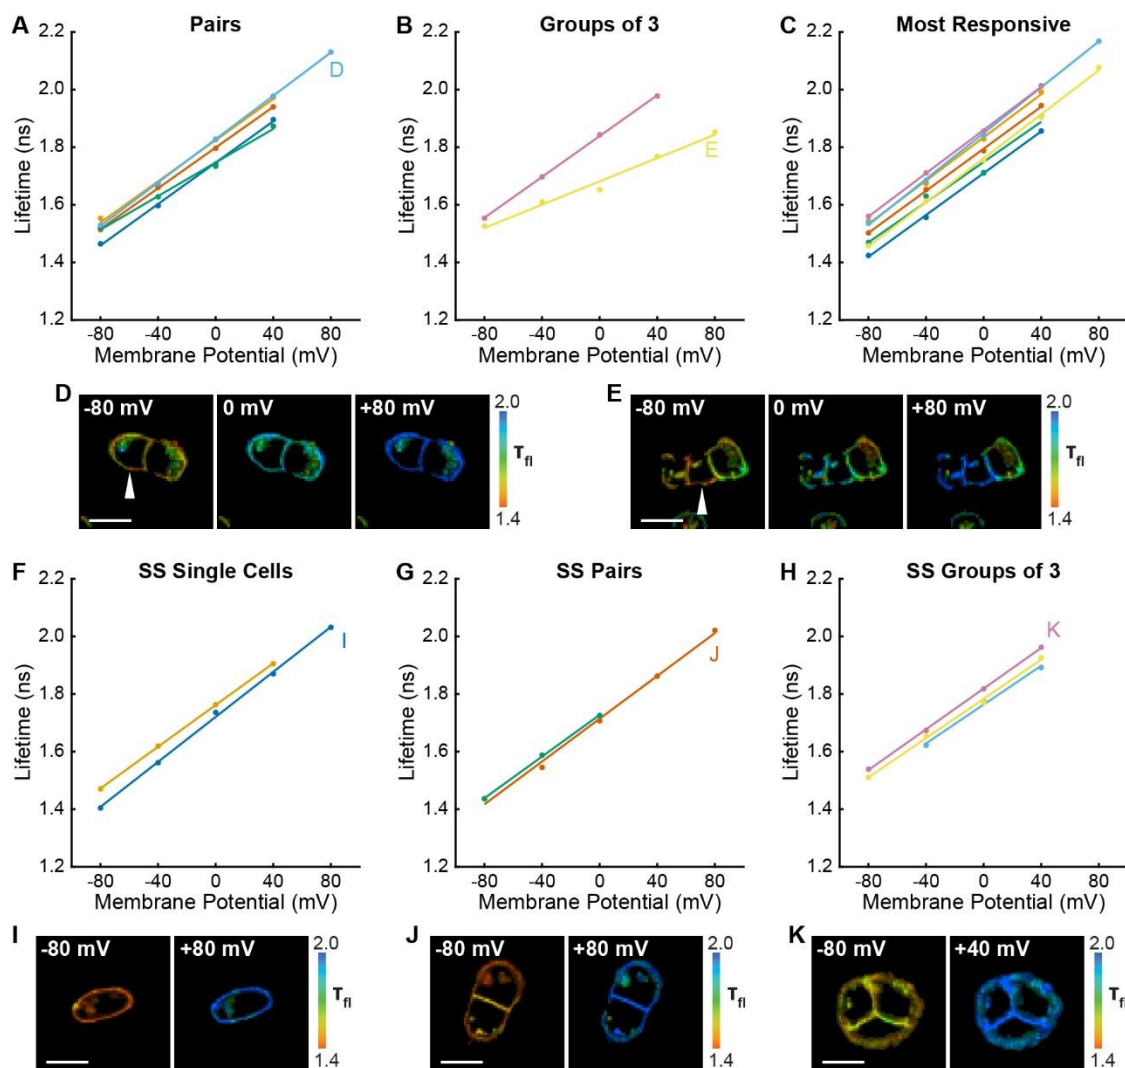

1099  
 1100 **Fig. 2, S4. Relationship between lifetime and membrane potential extends to groups of cells and**  
 1101 **across culture conditions.** Electrophysiological calibration of lifetime was performed on small  
 1102 groups of A431 cells and on serum starved (SS) A431 cells to verify that the  $V_{mem}$ -lifetime standard  
 1103 curves for a given cell line are generalizable across many cellular growth conditions. For all  
 1104 graphs, each line represents a group of cells. Letters on the graphs indicate the subfigure where  
 1105 images from that recording are shown. (A) Lifetime-voltage relationships in cell pairs, in which  
 1106 only one cell was directly controlled with voltage-clamp electrophysiology. (B) Lifetime-voltage

1107 relationships in groups of three cells, in which only one cell was directly controlled with voltage-  
1108 clamp electrophysiology. **(C)** Lifetime for the most responsive cell from pairs and groups of three  
1109 in (A) and (B). Line color codes are maintained from (A) and (B). **(D, E)** Representative lifetime  
1110 images from (A) and (B) respectively. White arrow indicates cell directly controlled with  
1111 electrophysiology. **(F)** Lifetime-voltage relationship in SS single cells, **(G)** pairs, and **(H)** groups  
1112 of three cells. **(I)-(K)** Representative images from (F)-(H). Scale bars are 20  $\mu\text{m}$ .

1113 **Fig. 2, S5. Concentration dependence of VoltageFluor lifetime in four cell lines.**

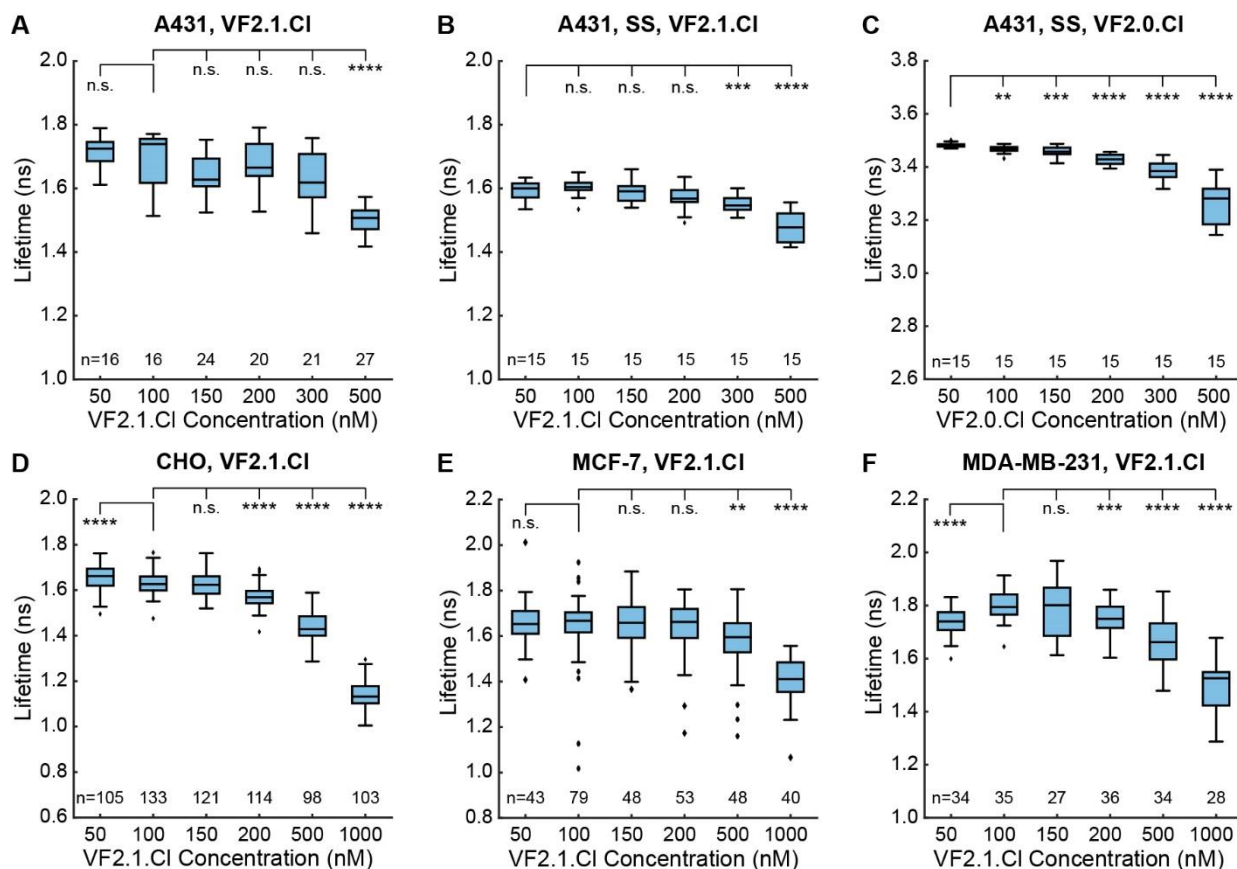

1114

1115 **Fig. 2, S5. Concentration dependence of VoltageFluor lifetime in four cell lines.** A431 cells were

1116 analyzed with VF2.1.Cl both in (A) full serum and (B) serum-starved conditions. (C) VF2.0.Cl in

1117 serum-starved A431 cells. (D) VF2.1.Cl in CHO cells. (E) VF2.1.Cl in MCF-7 cells. (F) VF2.1.Cl

1118 in MDA-MB-231 cells. All VF2.1.Cl data were fit with a biexponential model, and all VF2.0.Cl

1119 data were fit with a monoexponential model. Box plots represent the interquartile range, with

1120 whiskers and outliers determined with the Tukey method. Sample sizes indicate number of cell

1121 groups. Data were acquired over 2 to 4 different days from a total of 3 or 4 coverslips at each

1122 concentration. Asterisks indicate significant differences between the indicated concentration and

1123 the VF concentration selected for additional experiments (n.s.  $p > 0.05$ , \*  $p < 0.05$ , \*\*  $p < 0.01$ ,

1124 \*\*\*  $p < 0.001$ , \*\*\*\*  $p < 0.0001$ , two-sided, unpaired, unequal variances t-test).

1125 *Figure 3 Supplements*

1126 **Fig. 3, S1. Optically recorded  $V_{\text{mem}}$  distributions in HEK293T, MCF-7 and MDA-MB-231**

1127 **cells.**

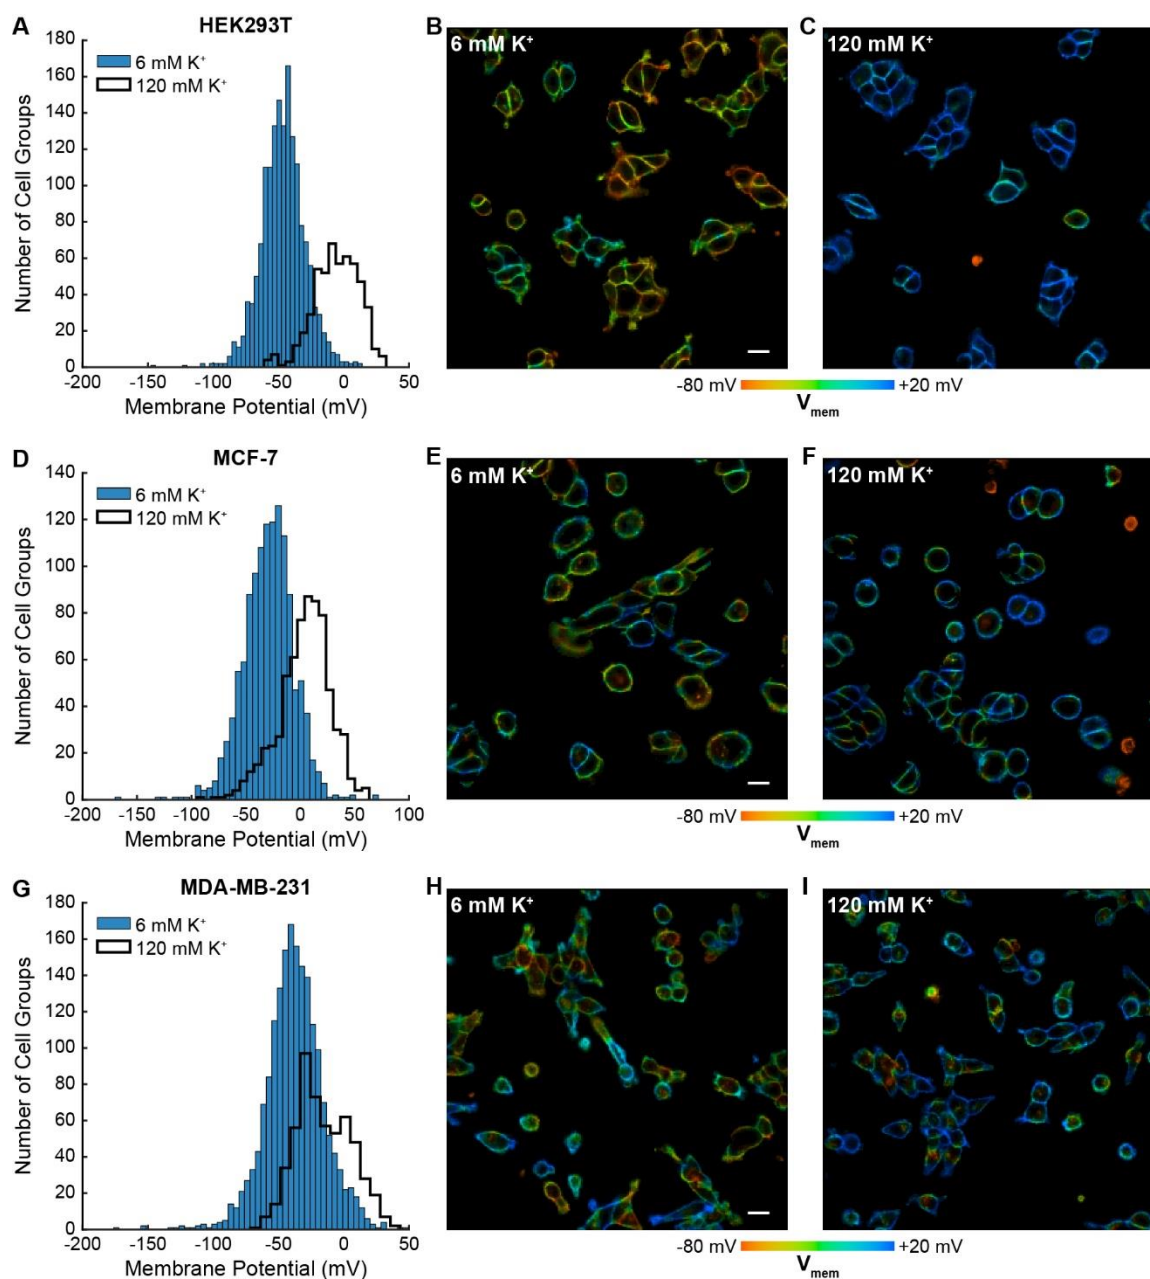

1128

1129 **Fig. 3, S1. Optically recorded  $V_{\text{mem}}$  distributions in HEK293T, MCF-7 and MDA-MB-231 cells.**

1130 Fluorescence lifetime images of cells incubated with 100 nM VF2.1.C1 were used to determine

1131  $V_{\text{mem}}$  from previously performed electrophysiological calibration (**Fig. 2**). (**A**) Histograms of  $V_{\text{mem}}$

1132 values recorded in HEK293T cells incubated with 6 mM extracellular  $K^+$  (commercial HBSS,  
1133  $n=1613$ ) or 120 mM  $K^+$  (high  $K^+$  HBSS,  $n=520$ ). **(B)** Representative lifetime image of HEK293T  
1134 cells with 6 mM extracellular  $K^+$ . **(C)** Representative lifetime image of HEK293T cells in 120 mM  
1135 extracellular  $K^+$ . **(D)** Histograms of  $V_{mem}$  values observed in MCF-7 cells under normal ( $n=1259$ )  
1136 and high  $K^+$  ( $n=681$ ) conditions. Representative lifetime images of MCF-7 cells in **(E)** 6 mM and  
1137 **(F)** 120 mM extracellular  $K^+$ . **(G)** Histograms of  $V_{mem}$  values observed in MDA-MB-231 cells  
1138 under normal ( $n=1840$ ) and high  $K^+$  ( $n=558$ ) conditions. Representative lifetime images of MDA-  
1139 MB-231 cells in **(H)** 6 mM and **(I)** 120 mM extracellular  $K^+$ . Histogram bin sizes were determined  
1140 by the Freedman-Diaconis rule. Intensities in the lifetime-intensity overlay images are not scaled  
1141 to each other. Scale bars, 20  $\mu m$ .

1142 **Fig. 3, S2. Representative images of cultured cell resting membrane potential.**

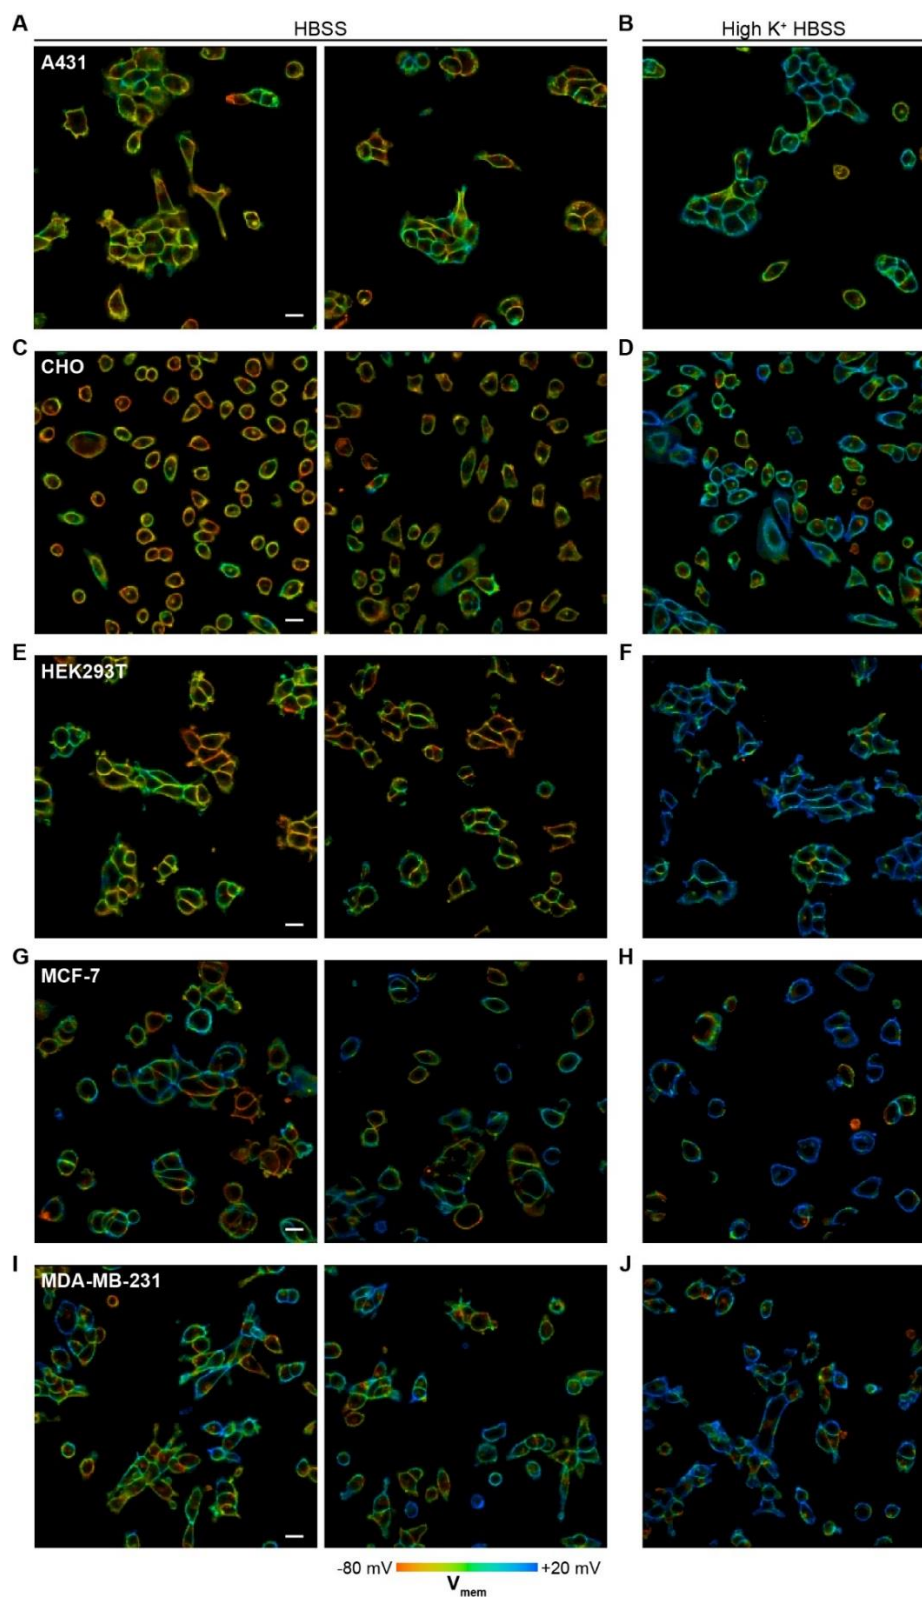

1143



1144 **Fig. 3, S2.** Representative images of cultured cell resting membrane potential. Representative VF-  
1145 FLIM images of cells in standard imaging buffer (HBSS, 6 mM extracellular K<sup>+</sup>) and high K<sup>+</sup>  
1146 imaging buffer (high K<sup>+</sup> HBSS, 120 mM extracellular K<sup>+</sup>). Membrane potential was calculated per  
1147 cell group; analyses of pixel by pixel differences in lifetime fall beyond the resolution limit of the  
1148 VF-FLIM calibrations in this work. Images depict A431 cells in (A) HBSS and (B) high K<sup>+</sup> HBSS;  
1149 CHO cells in (C) HBSS and (D) high K<sup>+</sup> HBSS; HEK293T cells in (E) HBSS and (F) high K<sup>+</sup>  
1150 HBSS; MCF-7 cells in (G) HBSS and (H) high K<sup>+</sup> HBSS, and MDA-MB-231 cells in (I) HBSS  
1151 and (J) high K<sup>+</sup> HBSS.  
1152

1153 **Fig. 3, S3. V<sub>mem</sub> measurements made with VF-FLIM agree with previously reported values.**

| Cell Type  | VF-FLIM                               |                                                   | Patch-clamp electrophysiology                                                                                                                                                                         |                       |
|------------|---------------------------------------|---------------------------------------------------|-------------------------------------------------------------------------------------------------------------------------------------------------------------------------------------------------------|-----------------------|
|            | Resting V <sub>mem</sub> (mean ± SEM) | High K <sup>+</sup> V <sub>mem</sub> (mean ± SEM) | Compiled reported average or median V <sub>mem</sub> in cells at rest                                                                                                                                 | Mean of ephys. values |
| A431       | -41 ± 5                               | -26 ± 5                                           | -64 ± 1 (mean ± SEM) <sup>36</sup>                                                                                                                                                                    | -64                   |
| CHO        | -53 ± 4                               | -20 ± 4                                           | -21 ± 2 (mean ± SEM, 4 cells) <sup>66</sup><br>-31 ± 2.6 (mean ± SEM) <sup>67</sup><br>-35 (ranging -10 to -65 mV) <sup>68</sup>                                                                      | -30                   |
| HEK293T    | -47 ± 5                               | -6 ± 5                                            | -45 (ranging -40 to -50 mV) <sup>69</sup><br>-52 ± 1 (mean ± SEM) <sup>70</sup><br>-35 ± 2 (mean ± SEM) <sup>71</sup>                                                                                 | -44                   |
| MCF-7      | -29 ± 5                               | 4 ± 5                                             | -23 ± 1 (median ± SE of median) <sup>41</sup><br>-36 ± 5 (mean ± SEM) <sup>72</sup><br>-41 ± 20 (mean ± SD) <sup>40</sup><br>-42 (no error given) <sup>73</sup><br>-42 ± 5 (mean ± SEM) <sup>74</sup> | -29                   |
| MDA-MB-231 | -38 ± 5                               | -15 ± 5                                           | -19 ± 3 (mean ± SEM) <sup>75</sup><br>-26 ± 8 (mean ± SEM) <sup>76</sup><br>-39 ± 5 (mean ± SEM) <sup>72</sup>                                                                                        | -38                   |

1154

1155 **Fig. 3, S3. V<sub>mem</sub> measurements made with VF-FLIM agree with previously reported values.**

1156 Comparison of optically-determined resting membrane potential values (in millivolts) and

1157 previously reported values. This table summarizes data presented in **Fig. 3** and **Fig. 3 –**

1158 **supplement 1.** Optically determined membrane potentials were calculated from lifetime-V<sub>mem</sub>

1159 standard curves (**Fig. 2 – supplement 3**). For tabulated literature values, measures of error and

1160 central tendency were used from the original publication. In some cases, none were given or only

1161 ranges were discussed. The mean of the reported ephys values is the mean of the values listed here.

1162 Sample sizes for resting and elevated K<sup>+</sup>, respectively: A431 1056, 368; CHO 2410, 1310;

1163 HEK293T 1613, 520; MCF-7 1259, 681; MDA-MB-231 1840, 558.

1164 Figure 4 Supplements

1165 Fig. 4, S1. Individual VF-FLIM recordings of A431 EGF response.

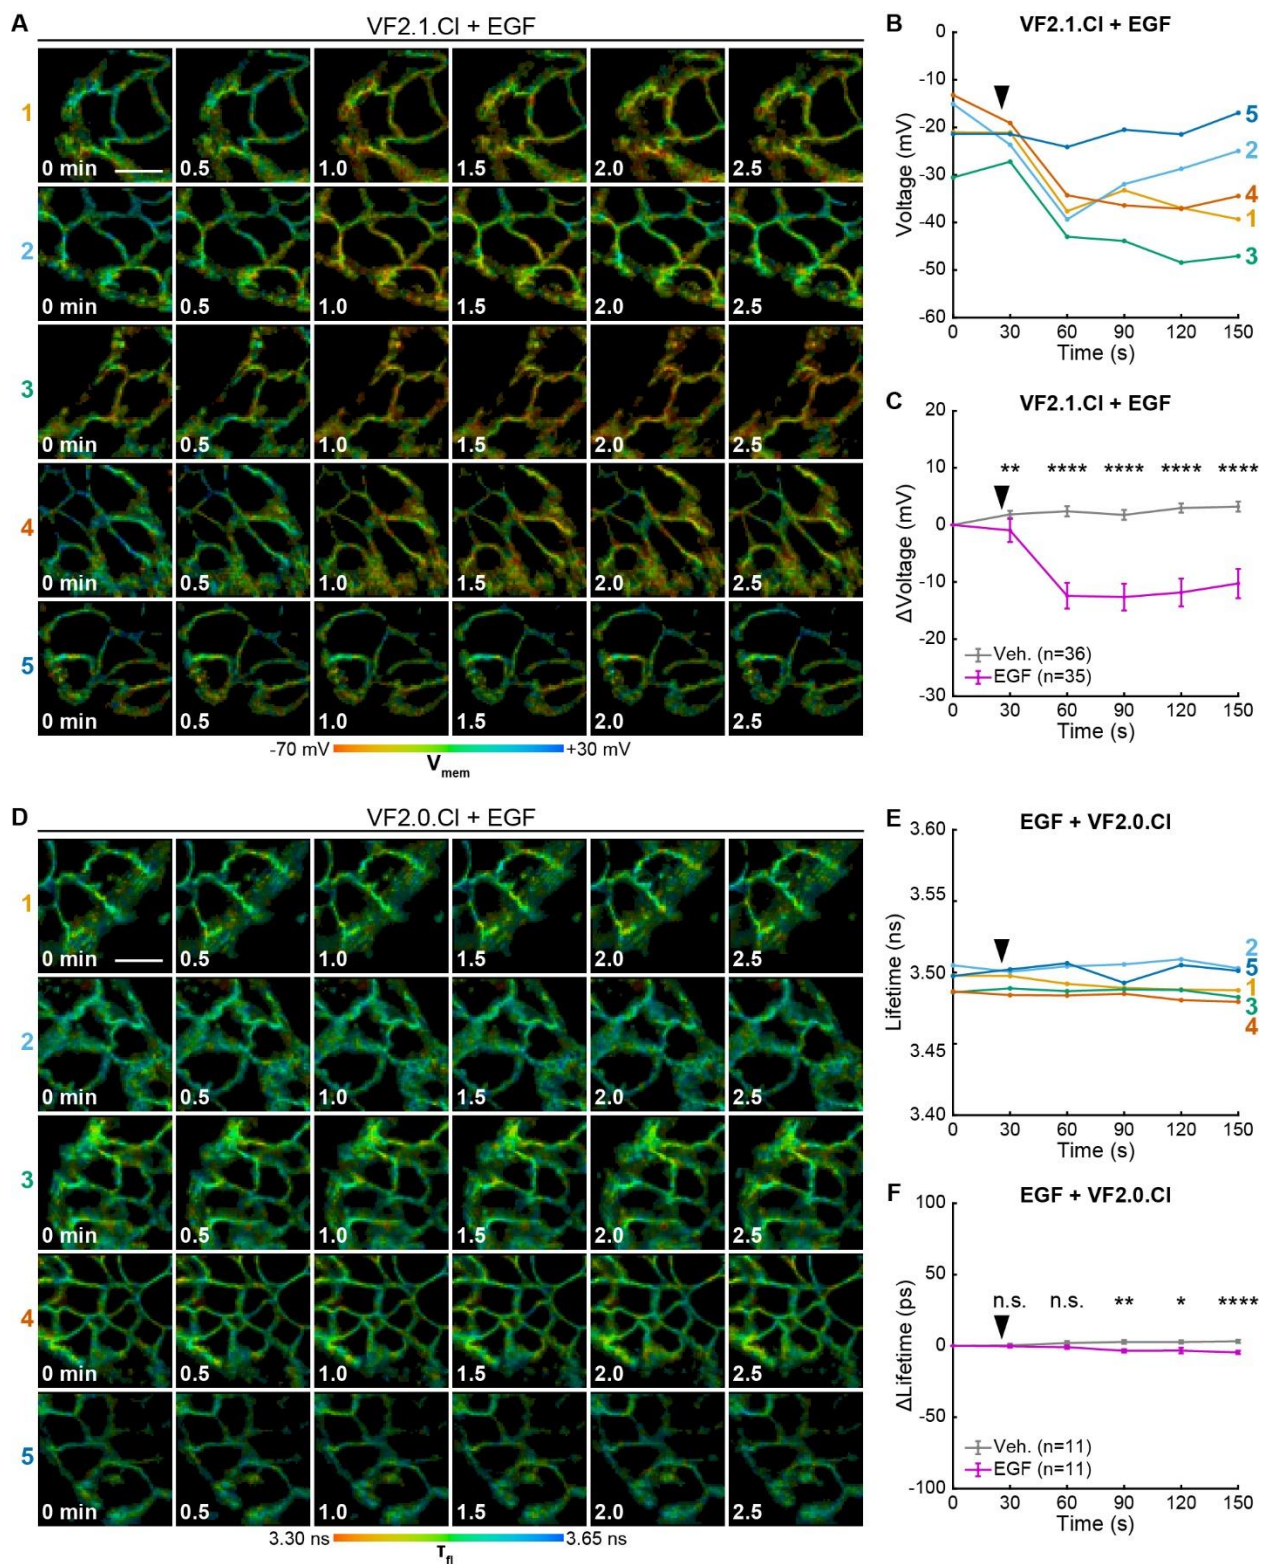

1166

1167 **Fig. 4, S1.** Individual VF-FLIM recordings of A431 EGF response. **(A)** Representative 3 minute  
1168 VF-FLIM recordings of A431 cells loaded with 50 nM VF2.1.Cl. 500 ng/mL EGF was added 30  
1169 seconds into the time series (black arrow). **(B)** Quantification of the images in (A), with a single  
1170 trace per image series shown. **(C)** Average voltage change in A431 cells following the addition of  
1171 imaging buffer vehicle (gray) or EGF (purple). **(D)** Control VF2.0.Cl (not voltage sensitive, 50  
1172 nM) images of A431 cells treated as in (A). Images are scaled across the same amount of lifetime  
1173 space (350 ps) as the VF2.1.Cl images. **(E)** Quantification of the images in (D). **(F)** Average  
1174 VF2.0.Cl lifetime change seen in A431 cells following the addition of imaging buffer vehicle  
1175 (gray) or EGF (purple) in A431 cells. Graph is scaled across the same amount of lifetime space as  
1176 the VF2.1.Cl data in (C). Asterisks indicate significant differences between vehicle and EGF  
1177 treated cells at a given time point (n.s.  $p > 0.05$ , \*  $p < 0.05$ , \*\*  $p < 0.01$ , \*\*\*  $p < 0.001$ , \*\*\*\*  $p <$   
1178  $0.0001$ , two-sided, unpaired, unequal variances t-test). Scale bars are 20  $\mu\text{m}$ .

1179 **Fig. 4, S2. Membrane potential changes in A431 cells 2.5 minutes after EGF treatment.**

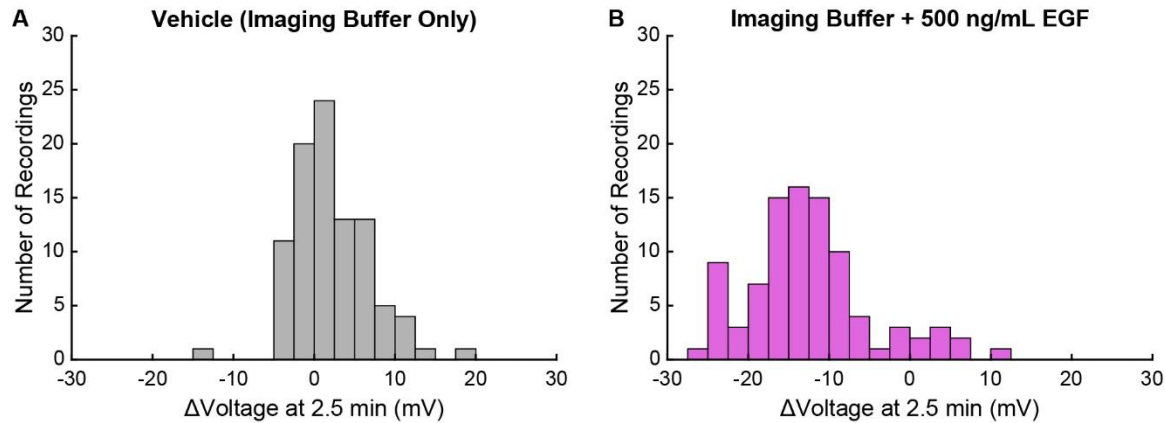

1180

1181 **Fig. 4, S2. Membrane potential changes in A431 cells 2.5 minutes after EGF treatment.**

1182 Comparison of  $V_{mem}$  changes observed in A431 cells 2.5 minutes after treatment with (A) imaging

1183 buffer vehicle or (B) 500 ng/mL EGF. Data shown here are compiled from **Fig. 4C** and **Fig. 5A** to

1184 provide a sense of overall distribution of the responses. Each recording contained a single group

1185 of approximately 5 to 10 cells. Sample sizes (number of recordings): Vehicle 93, EGF 92.

1186 **Fig. 4, S3. VF-FLIM reports A431  $V_{mem}$  changes over 15 minutes.**

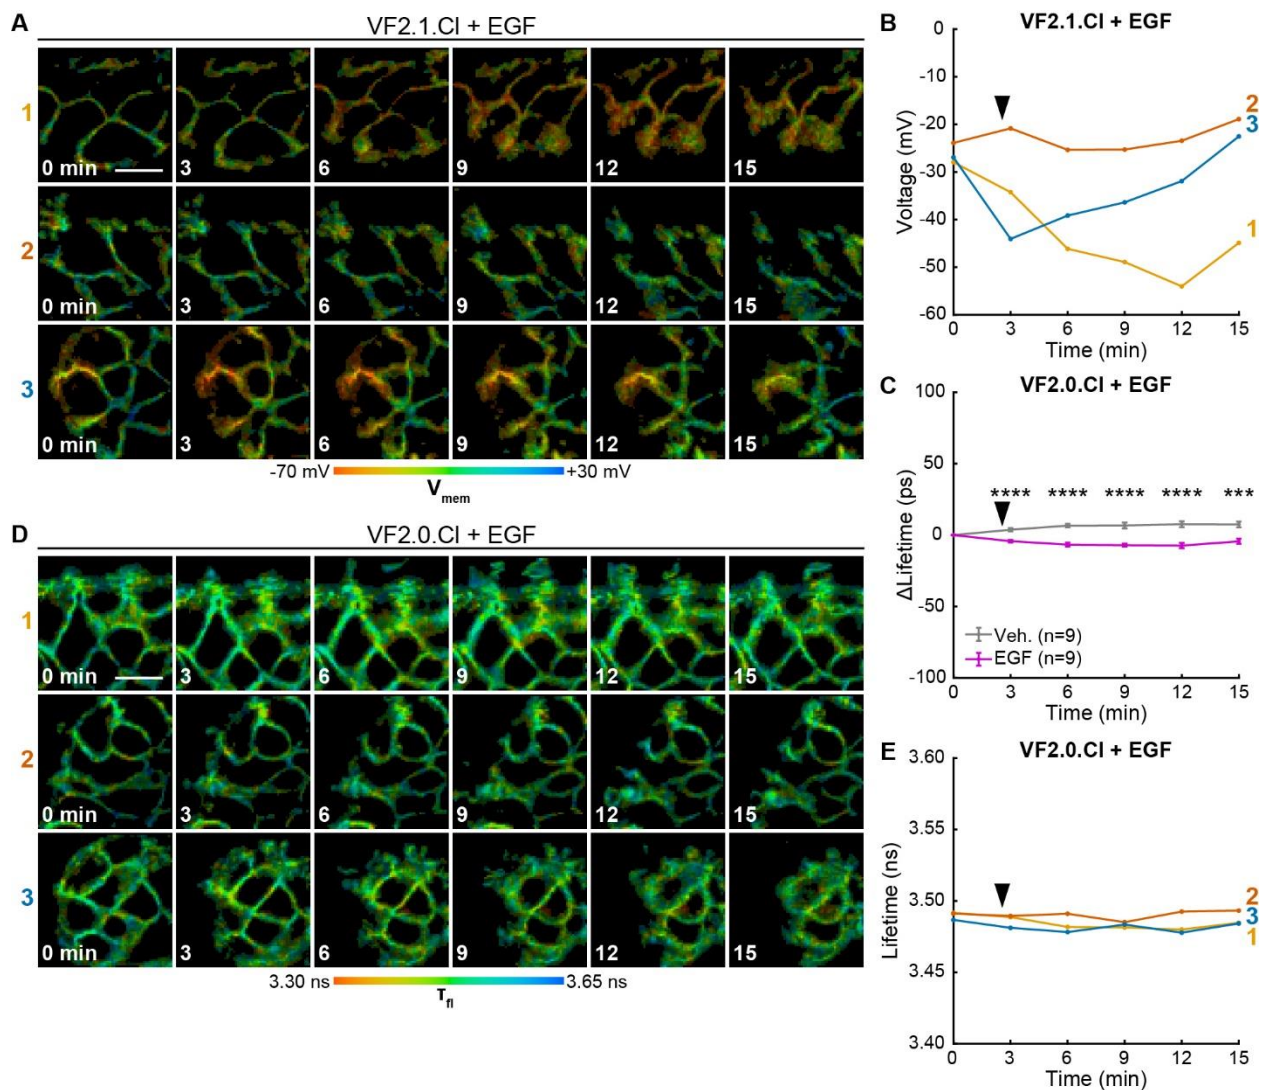

1187

1188 **Fig. 4, S3. VF-FLIM reports A431  $V_{mem}$  changes over 15 minutes. (A)** Representative longer term

1189 VF-FLIM recordings of A431 cells loaded with 50 nM VF2.1.Cl. 500 ng/mL EGF was added 30

1190 seconds into the time series. **(B)** Quantification of the images in (A), with a single trace per image

1191 series shown. **(C)** Control VF2.0.Cl (not voltage sensitive, 50 nM) images of A431 cells treated as

1192 in (A). Images are scaled across the same total lifetime range (350 ps) as the VF2.1.Cl images. **(D)**

1193 Quantification of the recordings in (C). **(E)** Average VF2.0.Cl lifetime change seen in A431 cells

1194 following the addition of imaging buffer vehicle (gray) or EGF (purple). Asterisks indicate

- 1195 significant differences between vehicle and EGF treated cells at a given time point (\*\* $p < 0.001$ ,
- 1196 \*\*\*\*  $p < 0.0001$ , two-sided, unpaired, unequal variances t-test). Scale bars are 20  $\mu\text{m}$ .

1197 **Fig. 4, S4. Dose-response relationship of A431 voltage response to EGF.**

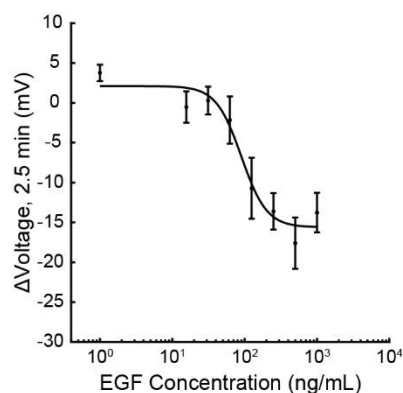

1198

1199 **Fig. 4, S4. Dose-response relationship of A431 voltage response to EGF.** Data were fit to a four-  
1200 parameter logistic function to obtain an EC<sub>50</sub> of 90 ng/mL (95% CI: 47-130 ng/mL). Response to  
1201 each EGF concentration is shown as mean ± SEM of 6 or 7 recordings (one group of 5-10 cells  
1202 per recording).



1203 **Fig. 4, S5. Effect sizes of VF2.1.Cl and VF2.0.Cl response to EGF treatment.**

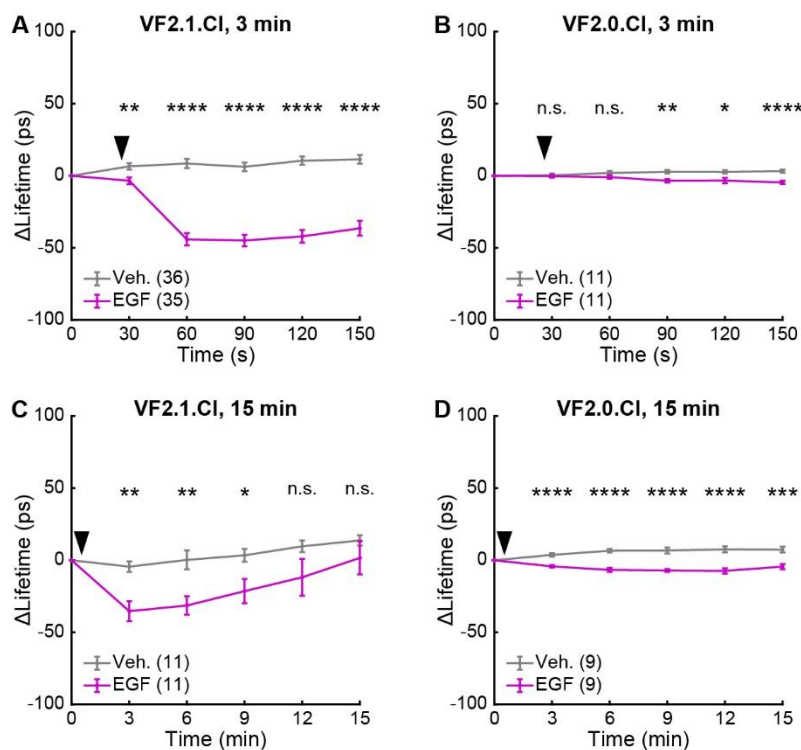

1204

1205 **Fig. 4, S5. Effect sizes of VF2.1.Cl and VF2.0.Cl response to EGF treatment.** Average lifetime

1206 changes observed in A431 cells following the addition (black arrow) of imaging buffer vehicle

1207 (gray) or 500 ng/mL EGF (purple). (A) Cells incubated with 50 nM VF2.1.Cl and imaged for 3

1208 minutes. (B) Cells incubated with 50 nM VF2.0.Cl (not voltage sensitive) and imaged for 3

1209 minutes. (C) Cells incubated with 50 nM VF2.1.Cl and imaged intermittently for 15 minutes. (D)

1210 Cells incubated with 50 nM VF2.0.Cl (not voltage sensitive) and imaged intermittently for 15

1211 minutes. Data are reproduced from **Fig. 4, Fig. 4-supplement 1, and Fig. 4 - supplement 3**, but

1212 here data are scaled in units of lifetime rather than voltage for facile comparison. Data are shown

1213 as mean  $\pm$  SEM for the indicated number of recordings (one group of 5-10 cells per recording).

1214 Asterisks indicate significant differences between vehicle and EGF treated cells at a given time

1215 point (n.s.  $p > 0.05$ , \*  $p < 0.05$ , \*\*  $p < 0.01$ , \*\*\*  $p < 0.001$ , \*\*\*\*  $p < 0.0001$ , two-sided, unpaired,

1216 unequal variances t-test).

1217 **Fig. 4, S6. EGFR inhibitors abolish voltage response to EGF in A431 cells.**

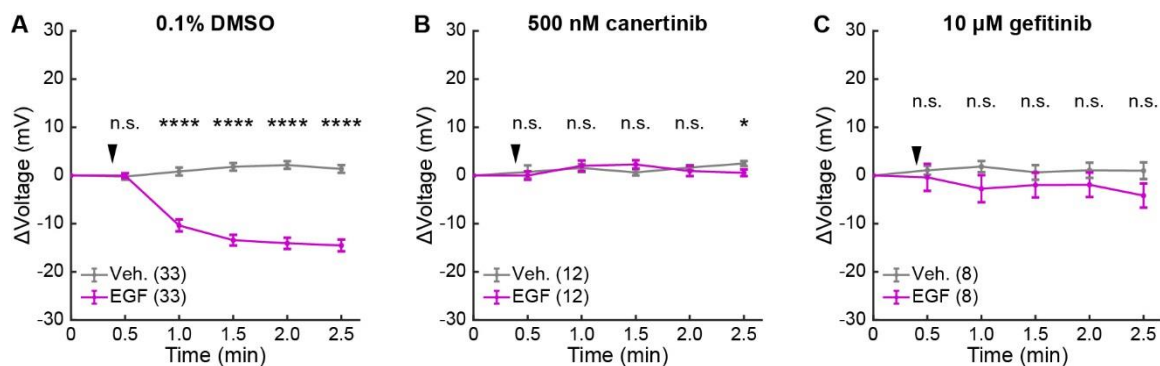

1218

1219 **Fig. 4, S6.** EGFR inhibitors abolish voltage response to EGF in A431 cells. Average  $V_{\text{mem}}$  changes  
1220 following the addition (black arrow) of imaging buffer vehicle (gray) or 500 ng/mL EGF (purple)  
1221 to A431 cells pre-treated with the indicated drug or DMSO vehicle. 2.5 minute time points from  
1222 this data are shown elsewhere (**Fig. 4J**); entire time series are shown here. Data are presented as  
1223 mean  $\pm$  SEM for the indicated number of recordings (one group of 5-10 cells per recording).  
1224 Asterisks indicate significant differences between vehicle and EGF treated cells at a given time  
1225 point (n.s.  $p > 0.05$ , \*  $p < 0.05$ , \*\*  $p < 0.01$ , \*\*\*  $p < 0.001$ , \*\*\*\*  $p < 0.0001$ , two-sided, unpaired,  
1226 unequal variances t-test).

1227 Figure 5 Supplements

1228 Fig. 5, S1. A431 voltage response to EGF with pharmacological intervention.

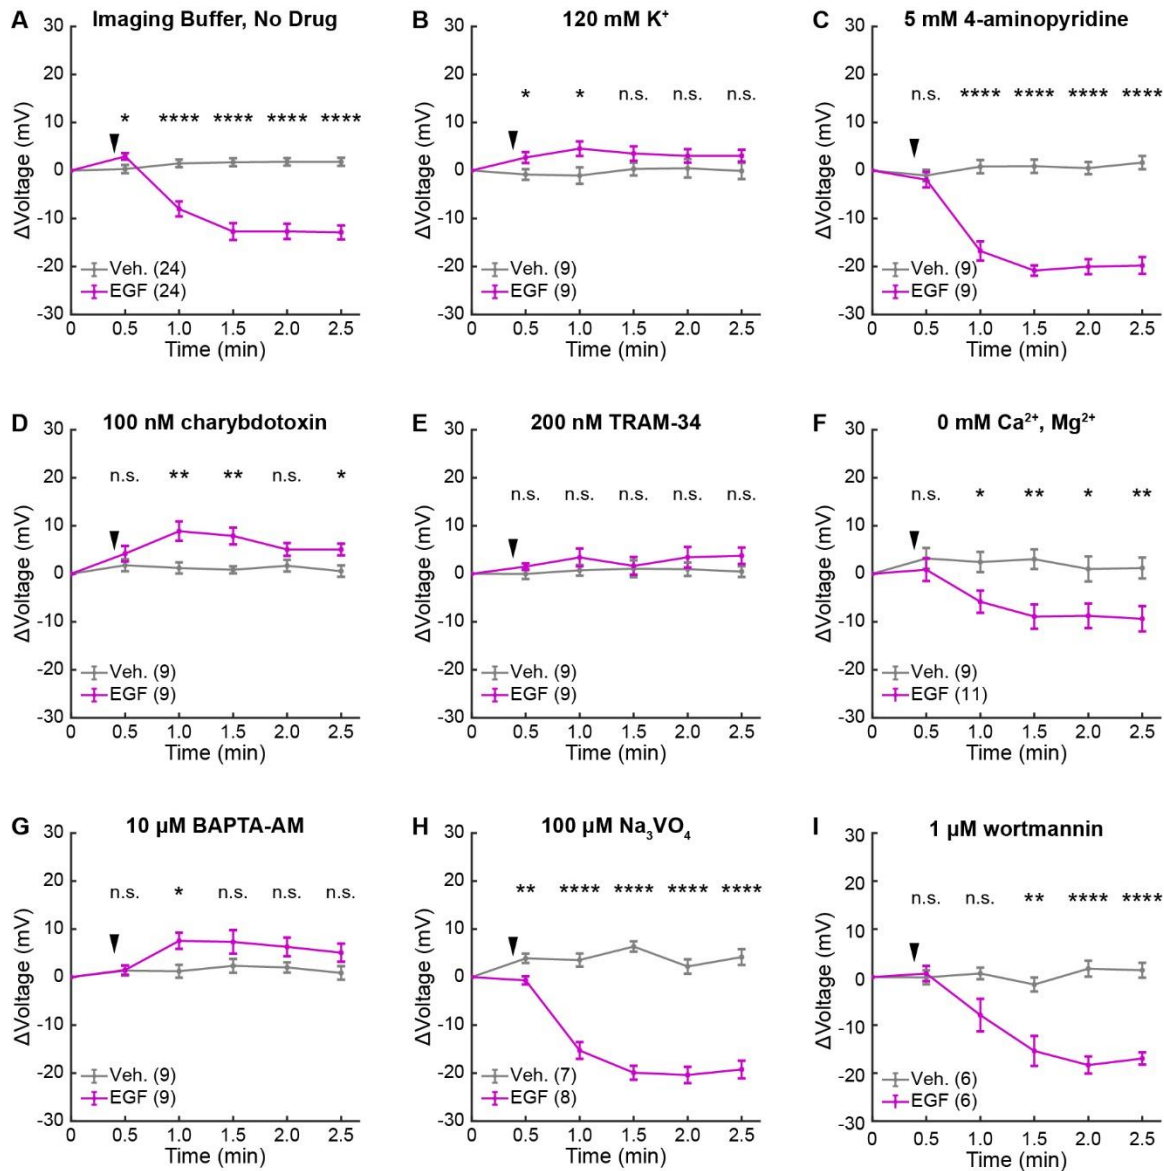

1229

1230 Fig. 5, S1. A431 voltage response to EGF with pharmacological intervention. Average  $V_{mem}$

1231 changes following the addition (black arrow) of imaging buffer vehicle (gray) or 500 ng/mL EGF

1232 (purple) to A431 cells pre-treated with the indicated drug or ionic composition change. 2.5 minute

1233 time points from this data are shown elsewhere (Fig. 5); entire time series are shown here to

1234 illustrate the time courses of the large hyperpolarizing current and small depolarizing current. Data

1235 are shown as mean  $\pm$  SEM for the indicated number of recordings (one group of 5-10 cells per  
1236 recording). Asterisks indicate significant differences between vehicle and EGF treated cells at a  
1237 given time point (n.s.  $p > 0.05$ , \*  $p < 0.05$ , \*\*  $p < 0.01$ , \*\*\*  $p < 0.001$ , \*\*\*\*  $p < 0.0001$ , two-sided,  
1238 unpaired, unequal variances t-test).

1239 **Fig. 5, S2. Effects of pharmacological and ionic perturbations on A431 resting membrane**  
1240 **potential.**

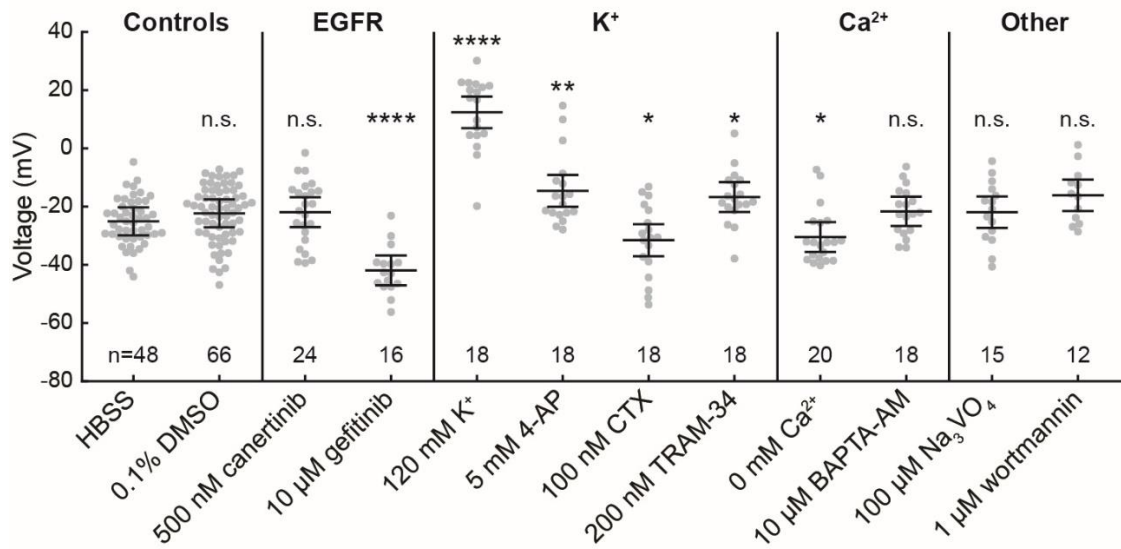

1241  
1242 **Fig. 5, S2.** Effects of pharmacological and ionic perturbations on A431 resting membrane  
1243 potential. Data are the initial  $V_{mem}$  reference images for recordings used in EGF addition time  
1244 series. Data are shown as mean  $\pm$  SEM for the indicated number of images (one group of 5-10  
1245 cells per image), and gray dots represent individual images. Asterisks indicate significant  
1246 differences between the appropriate vehicle (HBSS or 0.1% DMSO) and pharmacology treated  
1247 cells (n.s.  $p > 0.05$ , \*  $p < 0.05$ , \*\*  $p < 0.01$ , \*\*\*  $p < 0.001$ , \*\*\*\*  $p < 0.0001$ , two-sided, unpaired,  
1248 unequal variances t-test). CTX = charybdotoxin, 4-AP = 4-aminopyridine, BAPTA-AM =  
1249 bisaminophenoxyethanetraacetic acid acetoxymethyl ester.
